# Supplementary material
Source: PubMed Central journal article supplement (PMC6072002)

## Supporting Information

### Synthesis of novel pentacyclic triterpene-Neu5Ac2en derivatives and investigation of their in vitro anti-influenza entry activity

Yongying Shi<sup>a,1</sup>, Longlong Si<sup>a,1</sup>, Xu Han<sup>a,1</sup>, Zibo Fan<sup>a</sup>, Shouxin Wang<sup>a,c</sup>, Man Li<sup>a</sup>, Jiaqi Sun<sup>a</sup>, Yongmin Zhang<sup>b</sup>, Demin Zhou<sup>a</sup>, Sulong Xiao<sup>a,\*</sup>

*Dedicated to Professor Lihe Zhang on the Occasion of His 80th Birthday.*

<sup>a</sup>State Key Laboratory of Natural and Biomimetic Drugs, School of Pharmaceutical Sciences, Peking University, Beijing 100191, China

<sup>b</sup>Institut Parisien de Chimie Moléculaire, CNRS UMR 8232, Université Pierre & Marie Curie-Paris 6, 4 Place Jussieu, 75005 Paris, France

1. **SI Figure 1.** The NA inhibition assay P3
2. Selected <sup>1</sup>H, <sup>13</sup>C NMR and HRMS spectra P4

| NMR or HRMS                               | Page |
|-------------------------------------------|------|
| <sup>1</sup> H NMR of compound <b>6</b>   | 4    |
| <sup>13</sup> C NMR of compound <b>6</b>  | 4    |
| <sup>1</sup> H NMR of compound <b>7</b>   | 5    |
| <sup>13</sup> C NMR of compound <b>7</b>  | 5    |
| <sup>1</sup> H NMR of compound <b>8a</b>  | 6    |
| <sup>13</sup> C NMR of compound <b>8a</b> | 6    |
| HRMS of compound <b>8a</b>                | 7    |
| <sup>1</sup> H NMR of compound <b>8b</b>  | 7    |
| <sup>13</sup> C NMR of compound <b>8b</b> | 8    |
| HRMS of compound <b>8b</b>                | 8    |
| <sup>1</sup> H NMR of compound <b>8c</b>  | 9    |
| <sup>13</sup> C NMR of compound <b>8c</b> | 9    |

|                                           |    |
|-------------------------------------------|----|
| HRMS of compound <b>8c</b>                | 10 |
| <sup>1</sup> H NMR of compound <b>8d</b>  | 10 |
| <sup>13</sup> C NMR of compound <b>8d</b> | 11 |
| HRMS of compound <b>8d</b>                | 11 |
| <sup>1</sup> H NMR of compound <b>9a</b>  | 12 |
| <sup>13</sup> C NMR of compound <b>9a</b> | 12 |
| HRMS of compound <b>9a</b>                | 13 |
| <sup>1</sup> H NMR of compound <b>9b</b>  | 13 |
| <sup>13</sup> C NMR of compound <b>9b</b> | 14 |
| HRMS of compound <b>9b</b>                | 14 |
| <sup>1</sup> H NMR of compound <b>9c</b>  | 15 |
| <sup>13</sup> C NMR of compound <b>9c</b> | 15 |
| HRMS of compound <b>9c</b>                | 16 |

|                                            |    |
|--------------------------------------------|----|
| <sup>1</sup> H NMR of compound <b>9d</b>   | 16 |
| <sup>13</sup> C NMR of compound <b>9d</b>  | 17 |
| HRMS of compound <b>9d</b>                 | 17 |
| <sup>1</sup> H NMR of compound <b>10a</b>  | 18 |
| <sup>13</sup> C NMR of compound <b>10a</b> | 18 |
| HRMS of compound <b>10a</b>                | 19 |
| <sup>1</sup> H NMR of compound <b>10b</b>  | 19 |
| <sup>13</sup> C NMR of compound <b>10b</b> | 20 |
| HRMS of compound <b>10b</b>                | 20 |
| <sup>1</sup> H NMR of compound <b>11</b>   | 21 |
| <sup>13</sup> C NMR of compound <b>11</b>  | 21 |
| <sup>1</sup> H NMR of compound <b>15a</b>  | 22 |
| <sup>13</sup> C NMR of compound <b>15a</b> | 22 |
| HRMS of compound <b>15a</b>                | 23 |
| <sup>1</sup> H NMR of compound <b>15b</b>  | 23 |
| <sup>13</sup> C NMR of compound <b>15b</b> | 24 |
| HRMS of compound <b>15b</b>                | 24 |
| <sup>1</sup> H NMR of compound <b>15c</b>  | 25 |

|                                            |    |
|--------------------------------------------|----|
| <sup>13</sup> C NMR of compound <b>15c</b> | 25 |
| HRMS of compound <b>15c</b>                | 26 |
| <sup>1</sup> H NMR of compound <b>15d</b>  | 26 |
| <sup>13</sup> C NMR of compound <b>15d</b> | 27 |
| HRMS of compound <b>15d</b>                | 27 |
| <sup>1</sup> H NMR of compound <b>16a</b>  | 28 |
| <sup>13</sup> C NMR of compound <b>16a</b> | 28 |
| HRMS of compound <b>16a</b>                | 29 |
| <sup>1</sup> H NMR of compound <b>16b</b>  | 29 |
| <sup>13</sup> C NMR of compound <b>16b</b> | 30 |
| HRMS of compound <b>16b</b>                | 30 |
| <sup>1</sup> H NMR of compound <b>16c</b>  | 31 |
| <sup>13</sup> C NMR of compound <b>16c</b> | 31 |
| HRMS of compound <b>16c</b>                | 32 |
| <sup>1</sup> H NMR of compound <b>16d</b>  | 32 |
| <sup>13</sup> C NMR of compound <b>16d</b> | 33 |
| HRMS of compound <b>16d</b>                | 33 |

1. **SI Figure 1.** The NA inhibition assay of compound **15a**.

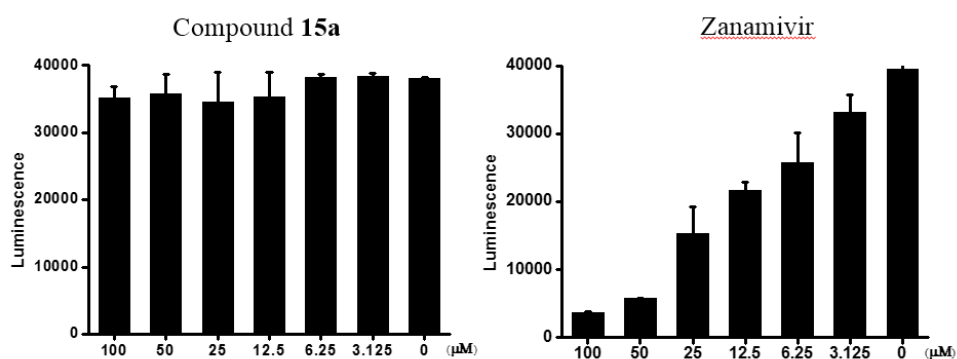

**SI Figure 1.** Compounds **15a** had no inhibitory effect on the influenza virus NA activity. Compound or zanamivir with two-fold serial dilution with PBS were mixed with influenza virus. The substrate solution (4-MUNANA) was mixed with the test compounds/virus mixture and incubated for 30 min at 37 °C. NA activity was measured by fluorescence of 4-methylumbelliferone with fluorescence spectrophotometer. Each point represents the mean  $\pm$  S.E.M. for three independent experiments.

**Figure 1.**  $^1\text{H}$  NMR (400 MHz,  $\text{CDCl}_3$ ) spectrum of compound **6**

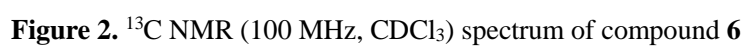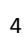

**Figure 3.**  $^1\text{H}$  NMR (400 MHz,  $\text{CDCl}_3$ ) spectrum of compound **7**

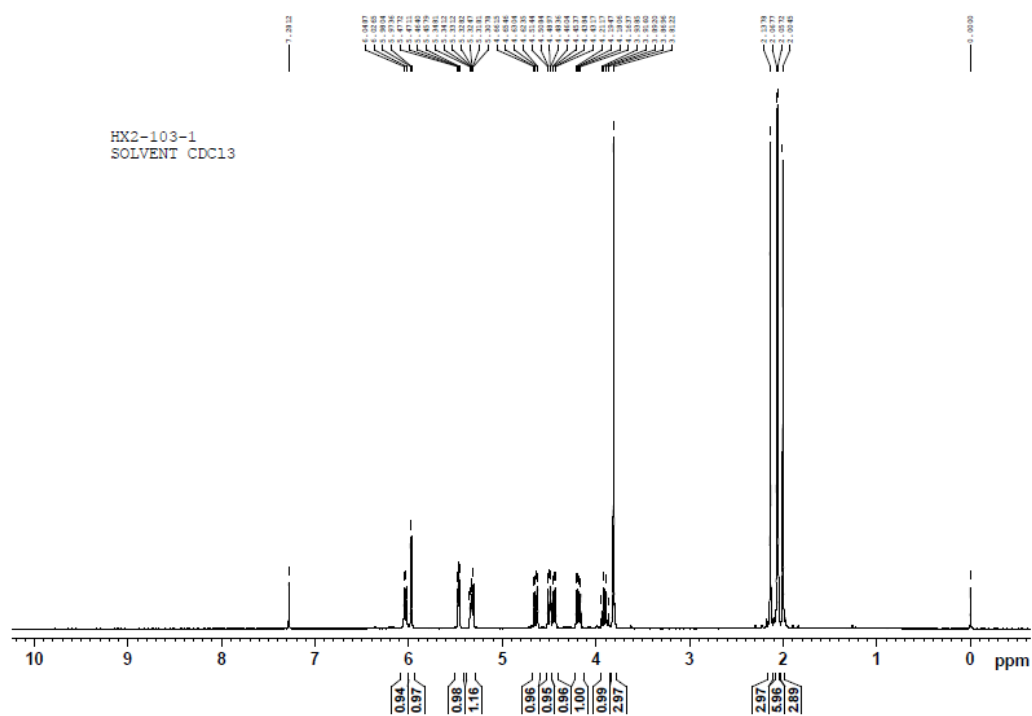

**Figure 4.**  $^{13}\text{C}$  NMR (100 MHz,  $\text{CDCl}_3$ ) spectrum of compound **7**

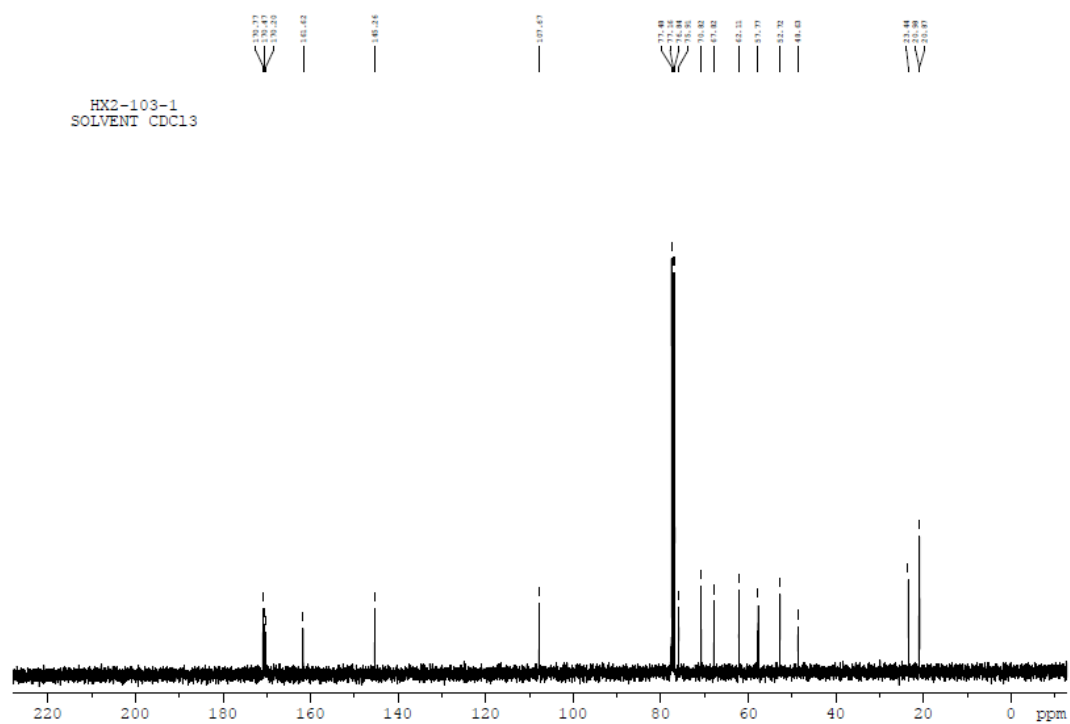

**Figure 5.**  $^1\text{H}$  NMR (400 MHz,  $\text{CDCl}_3$ ) spectrum of compound **8a**

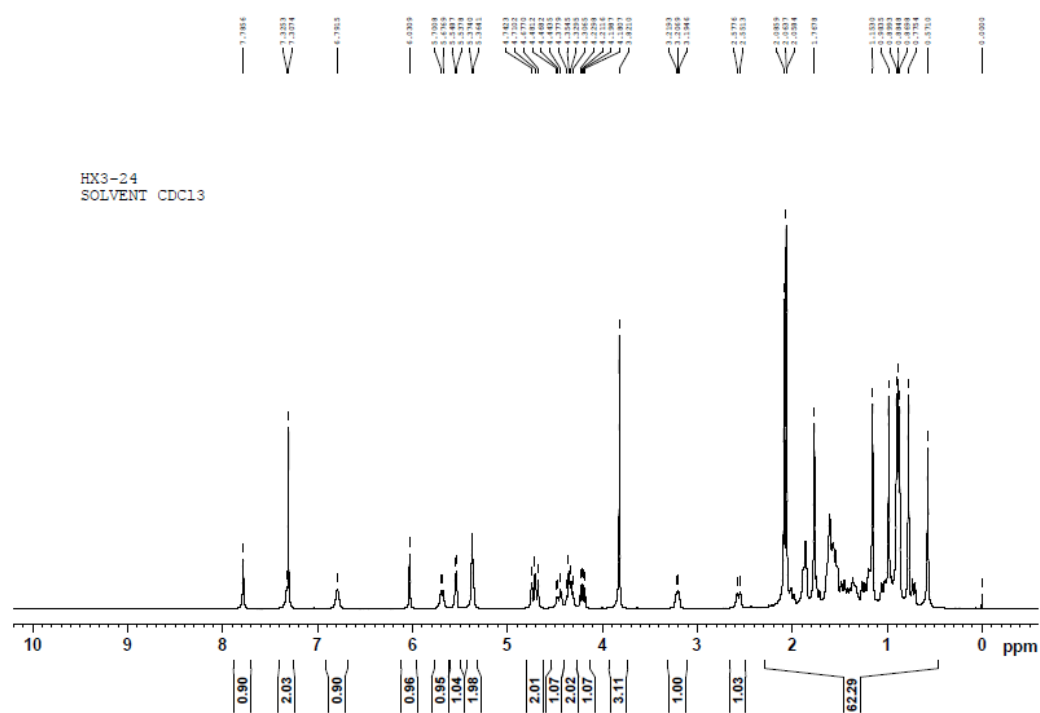

**Figure 6.**  $^{13}\text{C}$  NMR (100 MHz,  $\text{CDCl}_3$ ) spectrum of compound **8a**

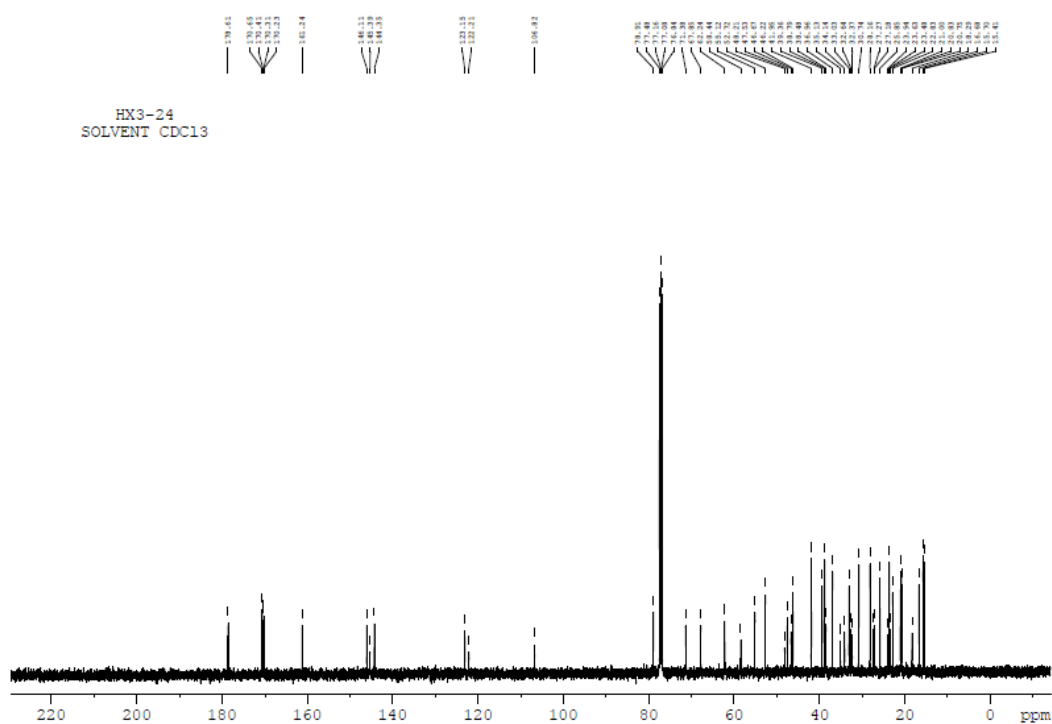

**Figure 7.** HR-ESI-MS spectrum of compound **8a**

# HIGH RESOLUTION MASS SPECTROMETRY REPORT

| Sample No. | Formula (M)    | Ion Formula       | Measured m/z | Calc m/z | Diff (ppm) |
|------------|----------------|-------------------|--------------|----------|------------|
| HX3-24     | C51 H75 N5 O12 | C51 H75 N5 Na O12 | 972.5309     | 972.5304 | -0.39      |

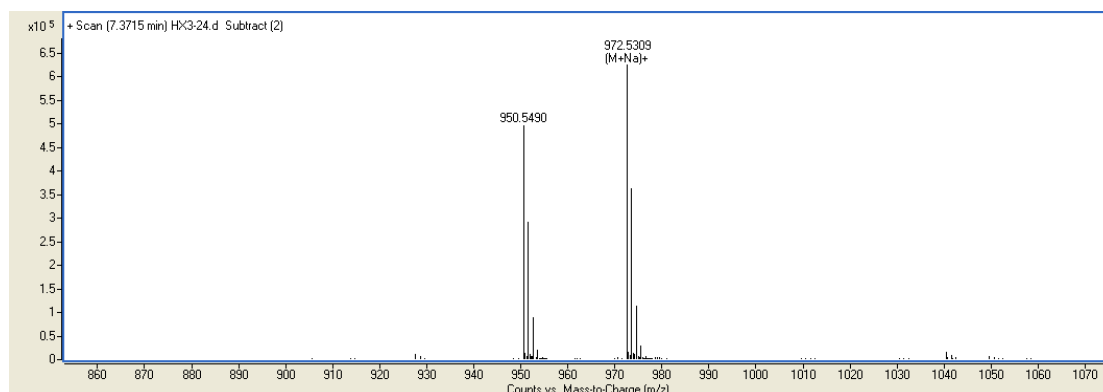

**Figure 8.**  $^1\text{H}$  NMR (400 MHz,  $\text{CDCl}_3$ ) spectrum of compound **8b**

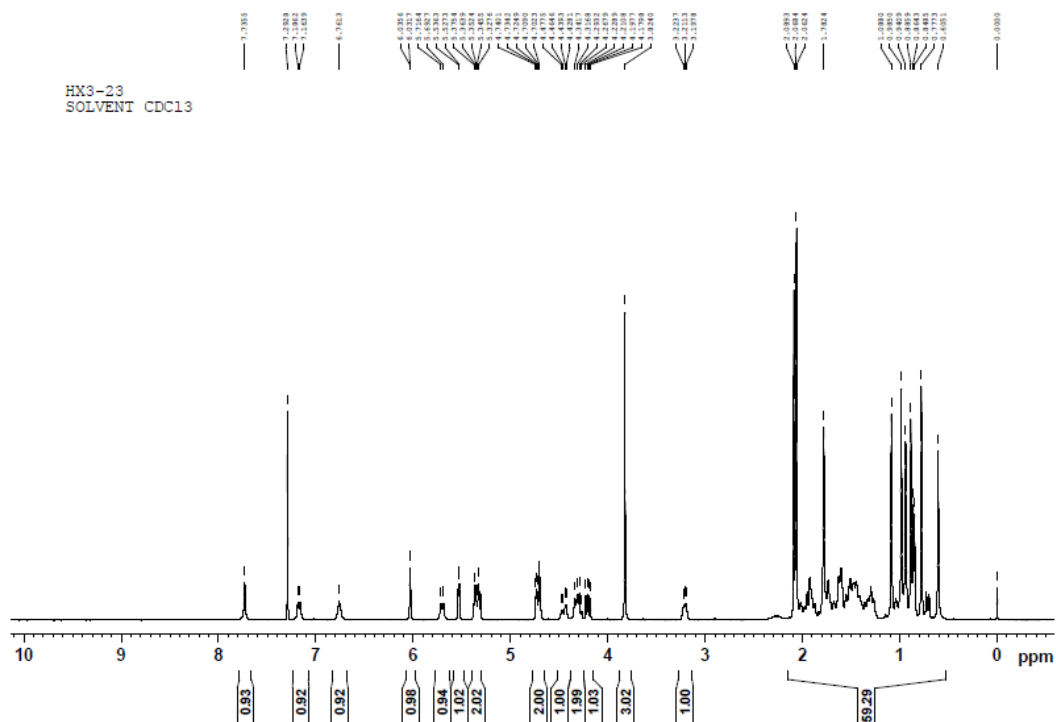

**Figure 9.**  $^{13}\text{C}$  NMR (100 MHz,  $\text{CDCl}_3$ ) spectrum of compound **8b**

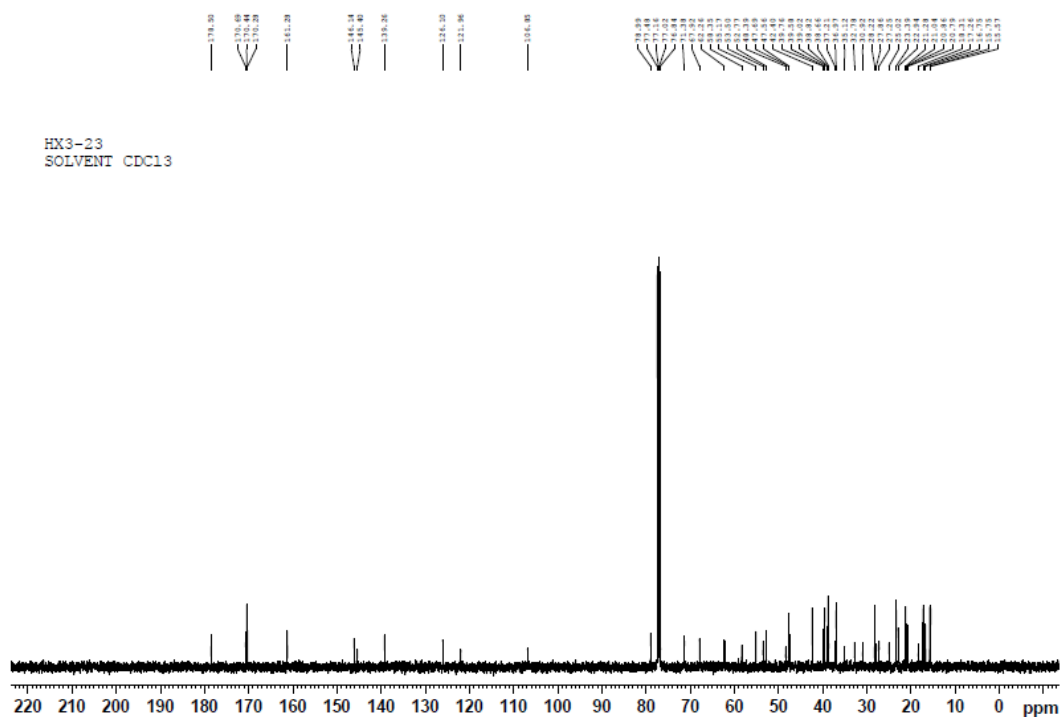

**Figure 10.** HR-ESI-MS spectrum of compound **8b**

#### HIGH RESOLUTION MASS SPECTROMETRY REPORT

| Sample No. | Formula (M)                                         | Ion Formula                                         | Measured m/z | Calc m/z | Diff (ppm) |
|------------|-----------------------------------------------------|-----------------------------------------------------|--------------|----------|------------|
| HX3-23     | $\text{C}_{51}\text{H}_{75}\text{N}_5\text{O}_{12}$ | $\text{C}_{51}\text{H}_{76}\text{N}_5\text{O}_{12}$ | 950.5493     | 950.5485 | -0.97      |

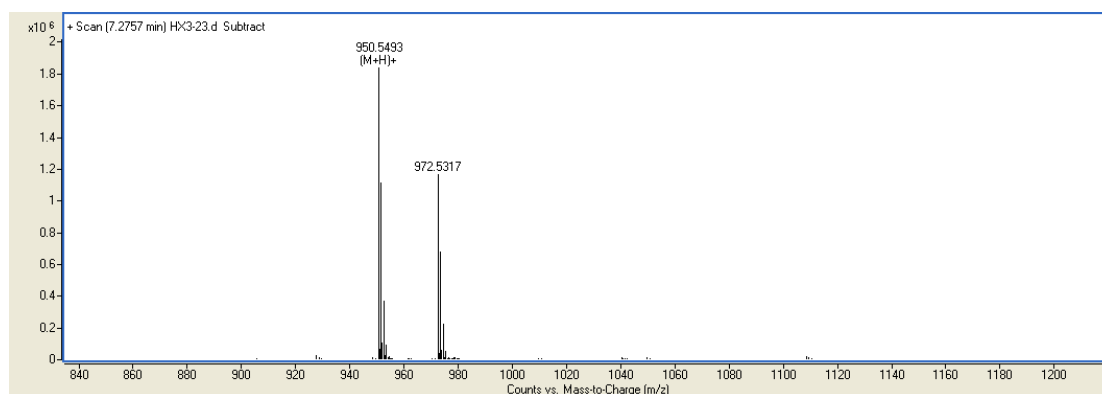



**Figure 11.**  $^1\text{H}$  NMR (400 MHz,  $\text{CDCl}_3$ ) spectrum of compound **8c**

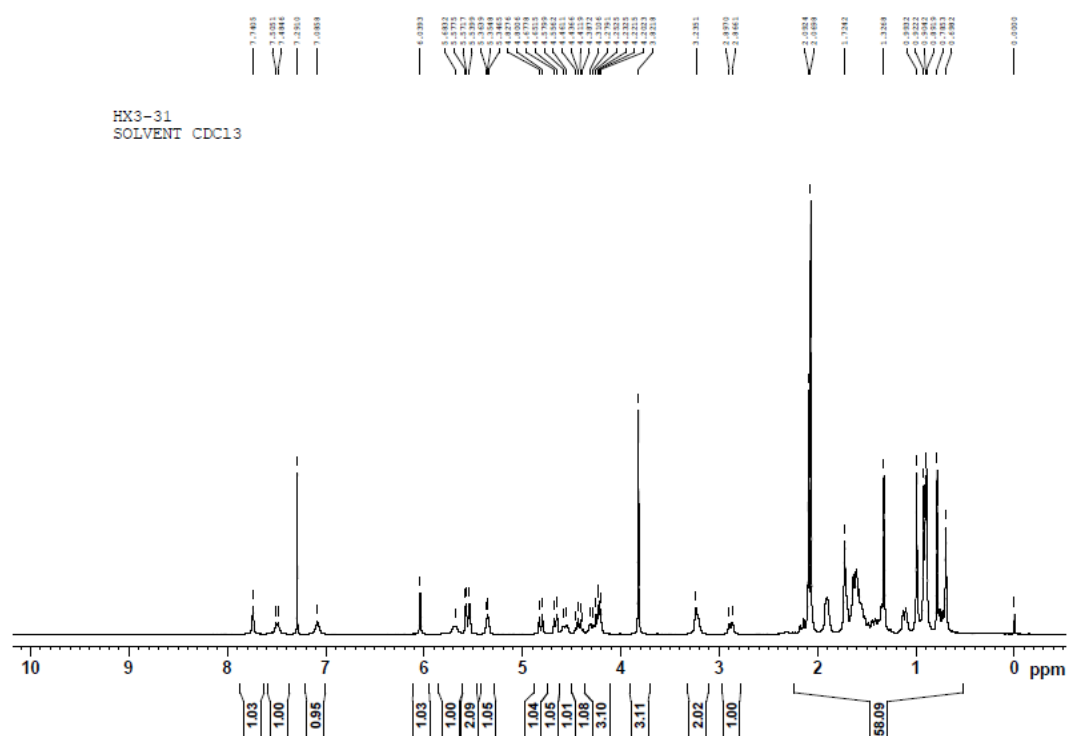

**Figure 12.**  $^{13}\text{C}$  NMR (100 MHz,  $\text{CDCl}_3$ ) spectrum of compound **8c**

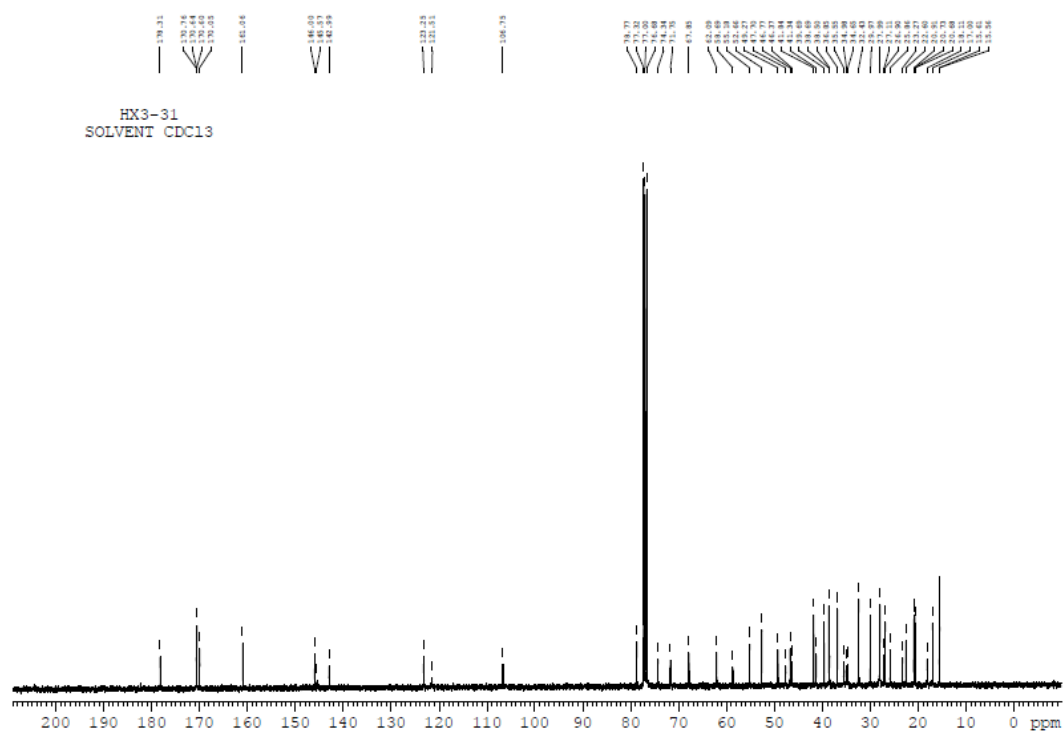

**Figure 13.** HR-ESI-MS spectrum of compound **8c**

**Figure 13.** HR-ESI-MS spectrum of compound **8c**

| Sample No. | Formula (M)    | Ion Formula    | Measured<br>m/z | Calc m/z | Diff<br>(ppm) |
|------------|----------------|----------------|-----------------|----------|---------------|
| HX3-31     | C51 H75 N5 O13 | C51 H76 N5 O13 | 966.5440        | 966.5434 | -0.68         |

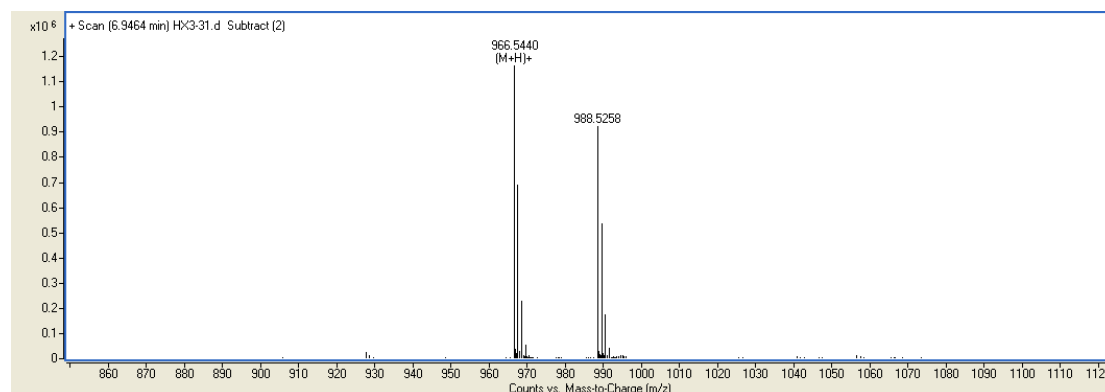

**Figure 14.**  $^1\text{H}$  NMR (400 MHz,  $\text{CDCl}_3$ ) spectrum of compound **8d**

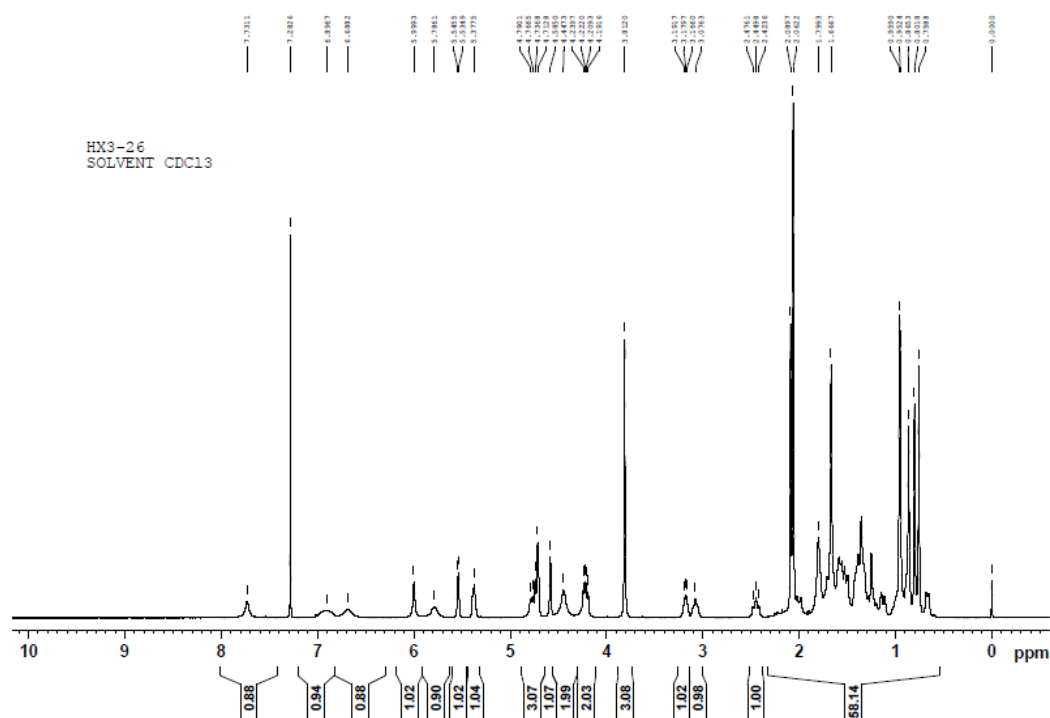

**Figure 15.**  $^{13}\text{C}$  NMR (100 MHz,  $\text{CDCl}_3$ ) spectrum of compound **8d**

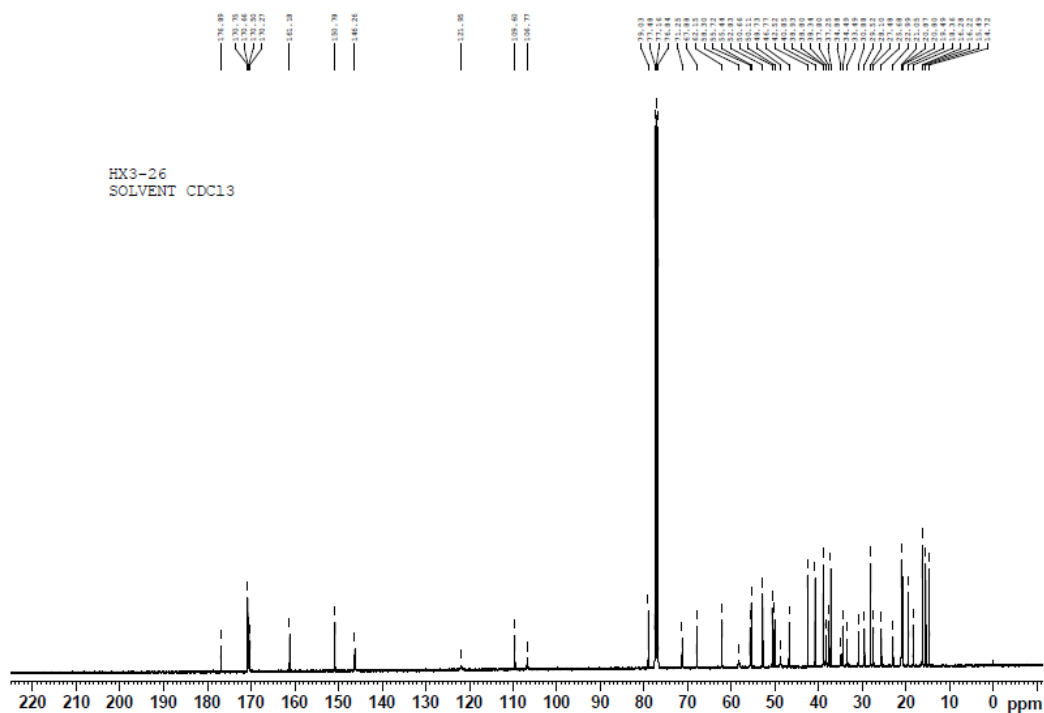

**Figure 16.** HR-ESI-MS spectrum of compound **8d**

HIGH RESOLUTION MASS SPECTROMETRY REPORT

| Sample No. | Formula (M)    | Ion Formula       | Measured m/z | Calc m/z | Diff (ppm) |
|------------|----------------|-------------------|--------------|----------|------------|
| HX3-26     | C51 H75 N5 O12 | C51 H75 N5 Na O12 | 972.5298     | 972.5304 | 0.85       |

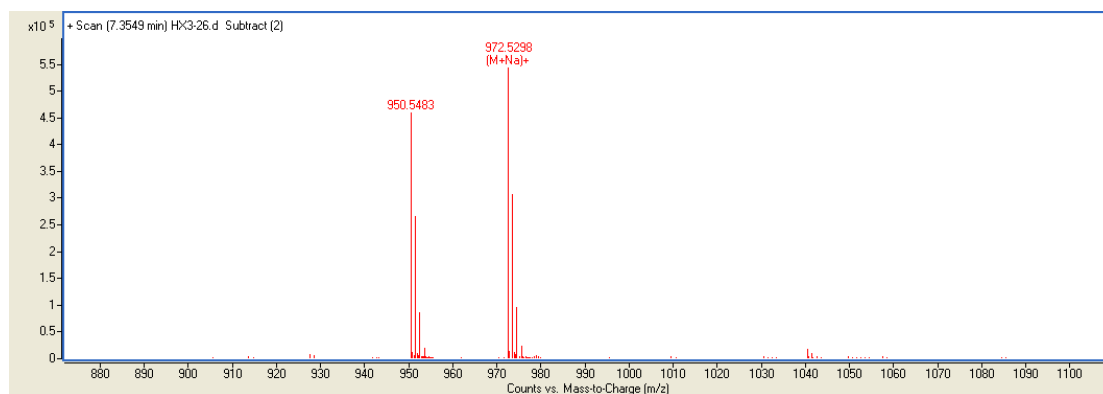

**Figure 17.**  $^1\text{H}$  NMR (400 MHz,  $\text{CD}_3\text{OD}$ ) spectrum of compound **9a**

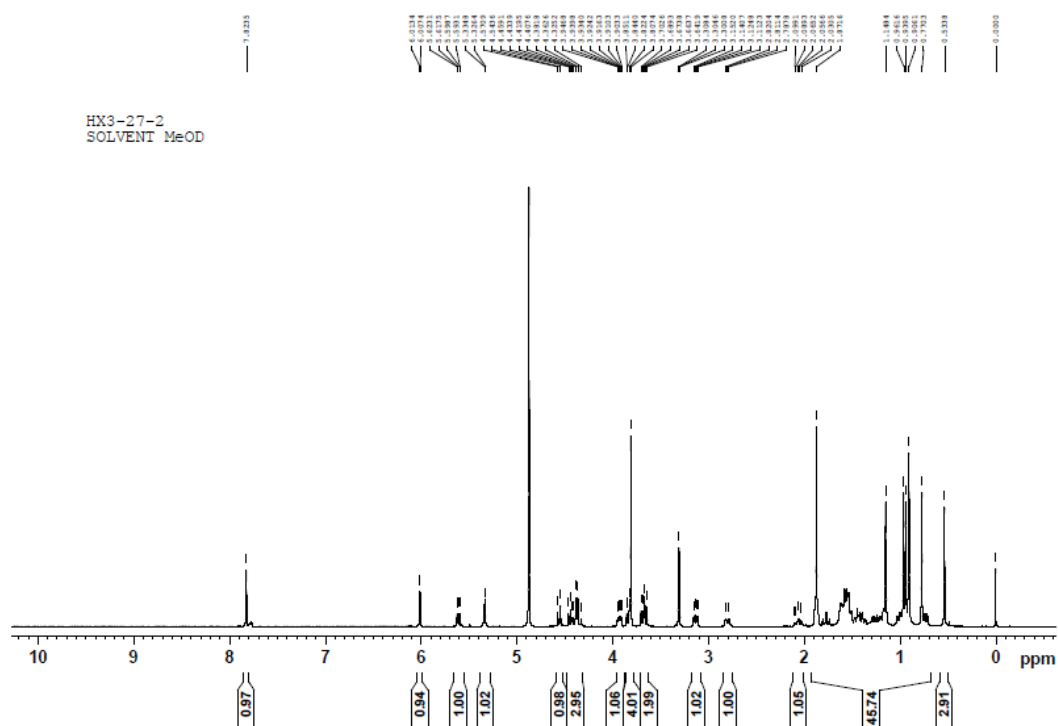

**Figure 18.**  $^{13}\text{C}$  NMR (100 MHz,  $\text{CD}_3\text{OD}$ ) spectrum of compound **9a**

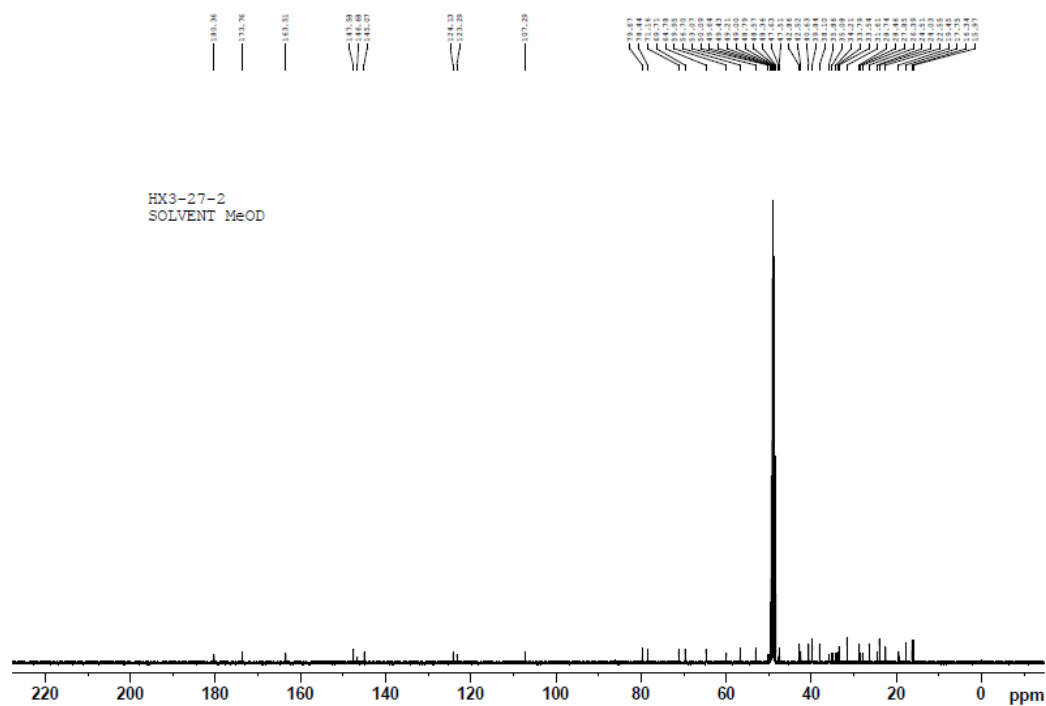

**Figure 19.** HR-ESI-MS spectrum of compound **9a**

HIGH RESOLUTION MASS SPECTROMETRY REPORT

| Sample No. | Formula (M)                                                   | Ion Formula                                                   | Measured m/z | Calc m/z | Diff (ppm) |
|------------|---------------------------------------------------------------|---------------------------------------------------------------|--------------|----------|------------|
| HX3-27-2   | C <sub>45</sub> H <sub>69</sub> N <sub>5</sub> O <sub>9</sub> | C <sub>45</sub> H <sub>70</sub> N <sub>5</sub> O <sub>9</sub> | 824.5174     | 824.5168 | -0.82      |

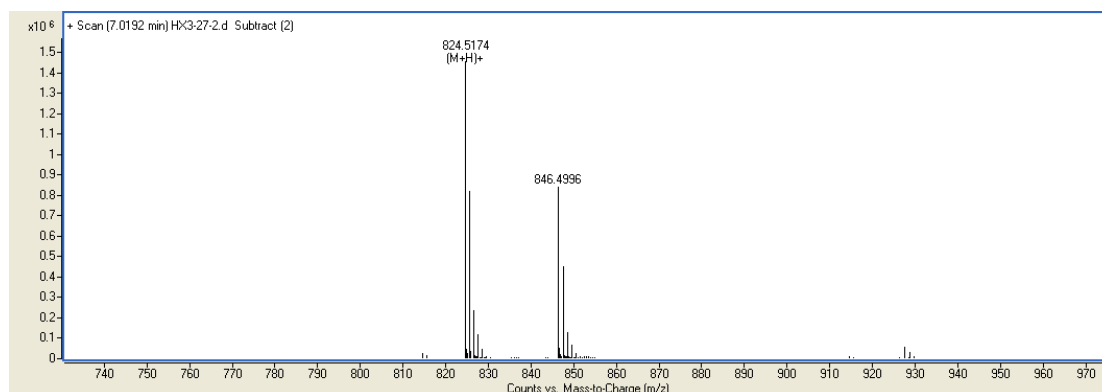

**Figure 20.** <sup>1</sup>H NMR (400 MHz, CD<sub>3</sub>OD) spectrum of compound **9b**

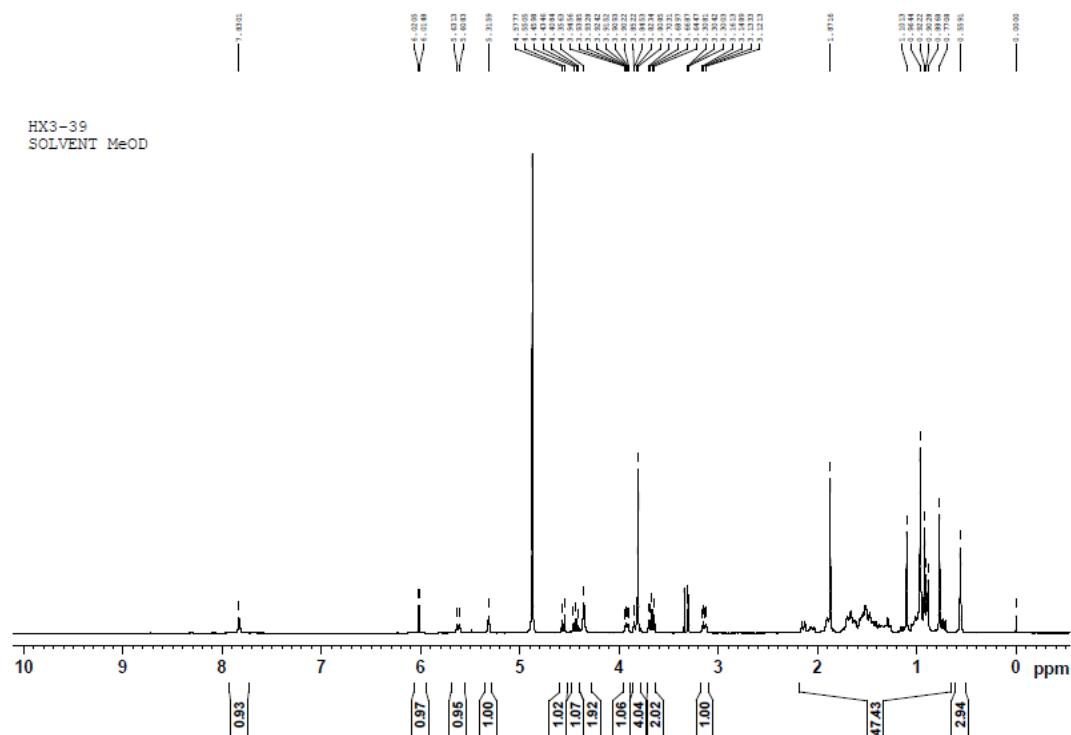

**Figure 21.**  $^{13}\text{C}$  NMR (100 MHz,  $\text{CD}_3\text{OD}$ ) spectrum of compound **9b**

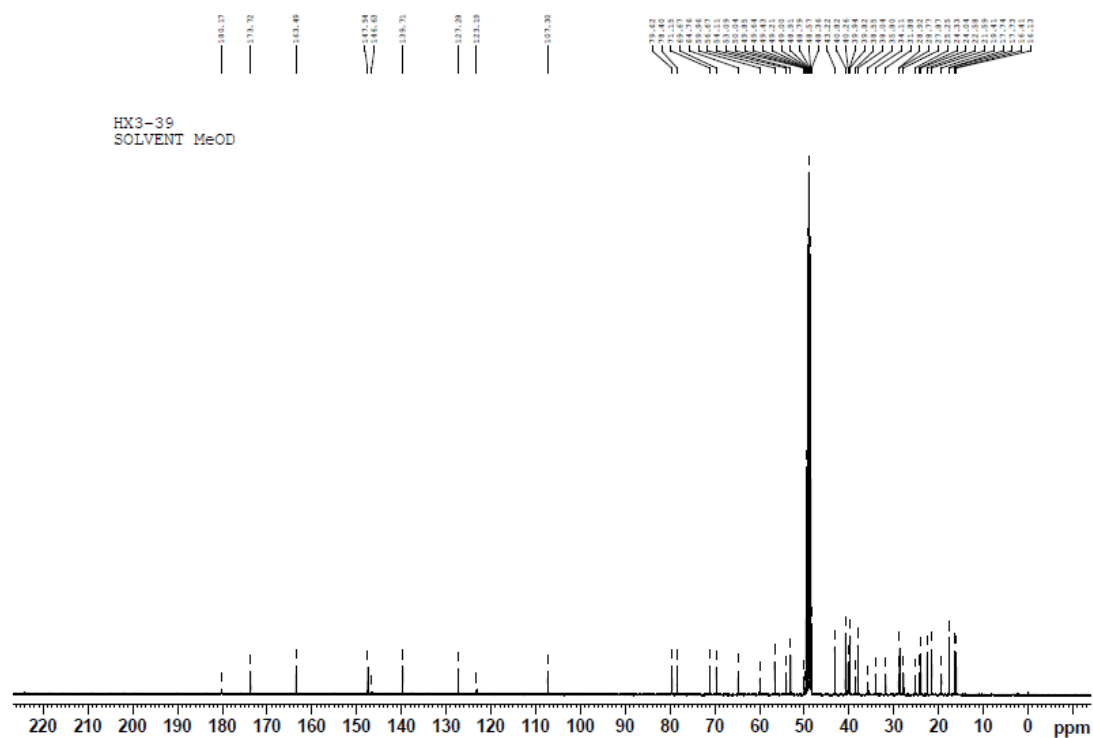

**Figure 22.** HR-ESI-MS spectrum of compound **9b**

# HIGH RESOLUTION MASS SPECTROMETRY REPORT

| Sample No. | Formula (M)                                                   | Ion Formula                                                   | Measured<br>m/z | Calc m/z | Diff<br>(ppm) |
|------------|---------------------------------------------------------------|---------------------------------------------------------------|-----------------|----------|---------------|
| HX3-39     | C <sub>45</sub> H <sub>69</sub> N <sub>5</sub> O <sub>9</sub> | C <sub>45</sub> H <sub>70</sub> N <sub>5</sub> O <sub>9</sub> | 824.5163        | 824.5168 | 0.47          |

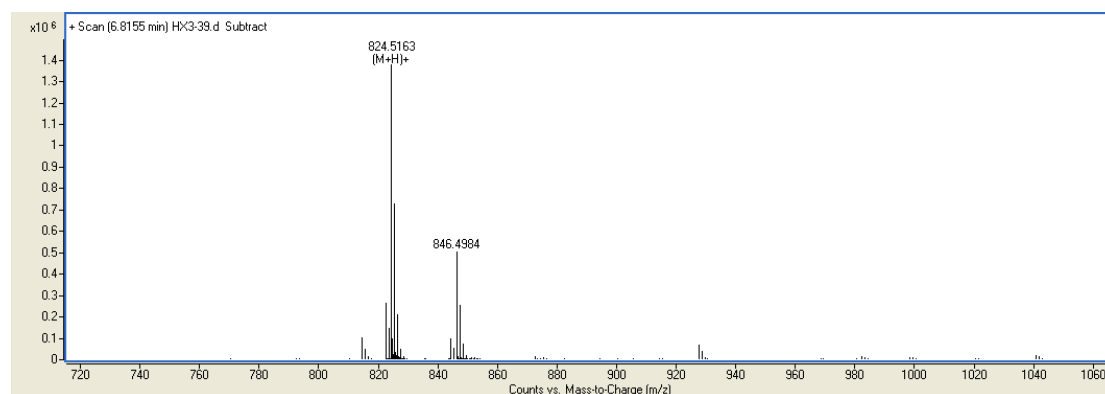

**Figure 23.**  $^1\text{H}$  NMR (400 MHz,  $\text{CD}_3\text{OD}$ ) spectrum of compound **9c**

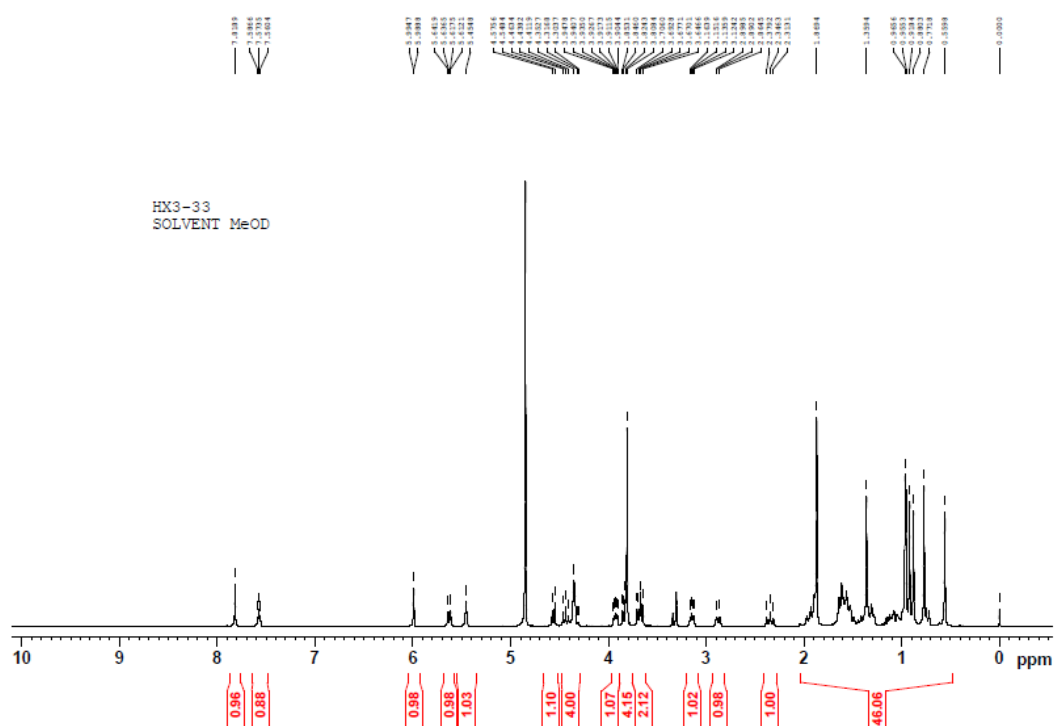

**Figure 24.**  $^{13}\text{C}$  NMR (100 MHz,  $\text{CD}_3\text{OD}$ ) spectrum of compound **9c**

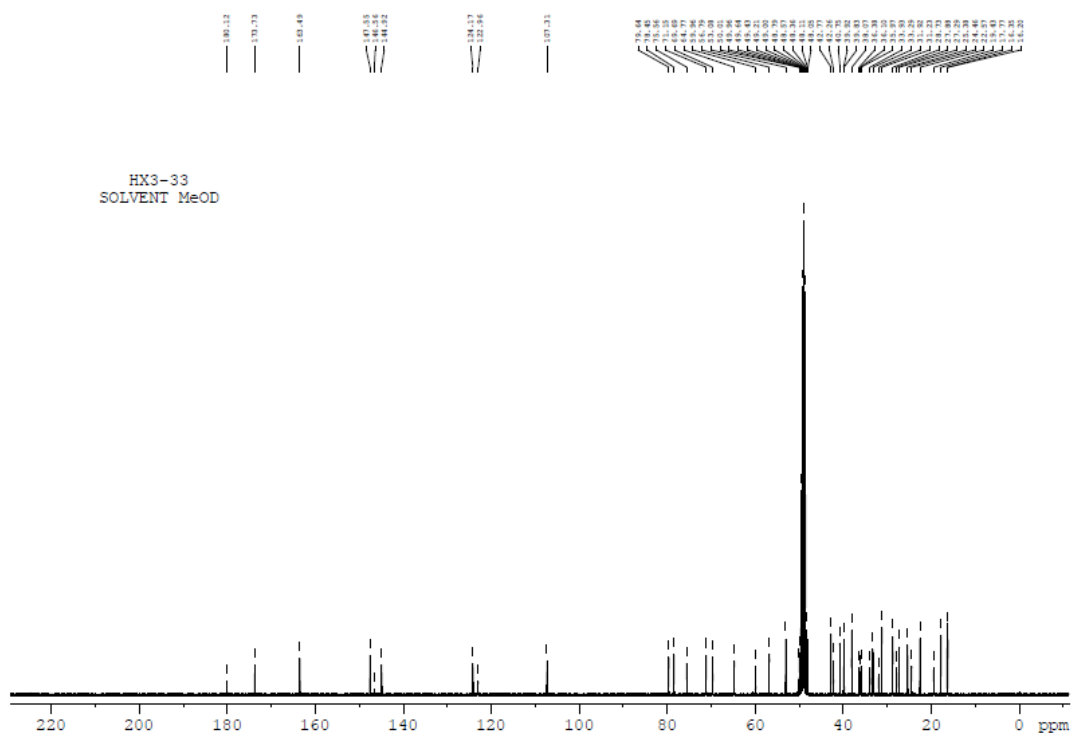

**Figure 25.** HR-ESI-MS spectrum of compound **9c**

HIGH RESOLUTION MASS SPECTROMETRY REPORT

| Sample No. | Formula (M)    | Ion Formula    | Measured m/z | Calc m/z | Diff (ppm) |
|------------|----------------|----------------|--------------|----------|------------|
| HX3-33     | C45 H69 N5 O10 | C45 H70 N5 O10 | 840.5125     | 840.5117 | -0.82      |

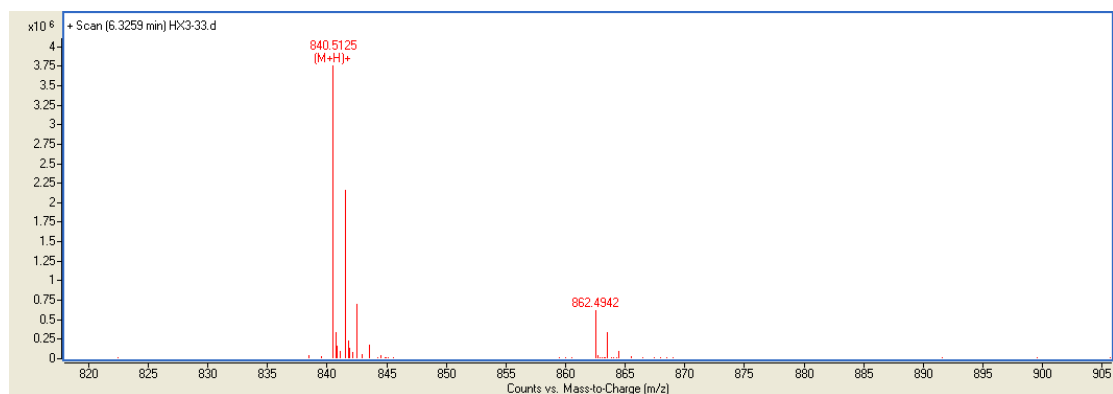

**Figure 26.** <sup>1</sup>H NMR (400 MHz, CD<sub>3</sub>OD) spectrum of compound **9d**

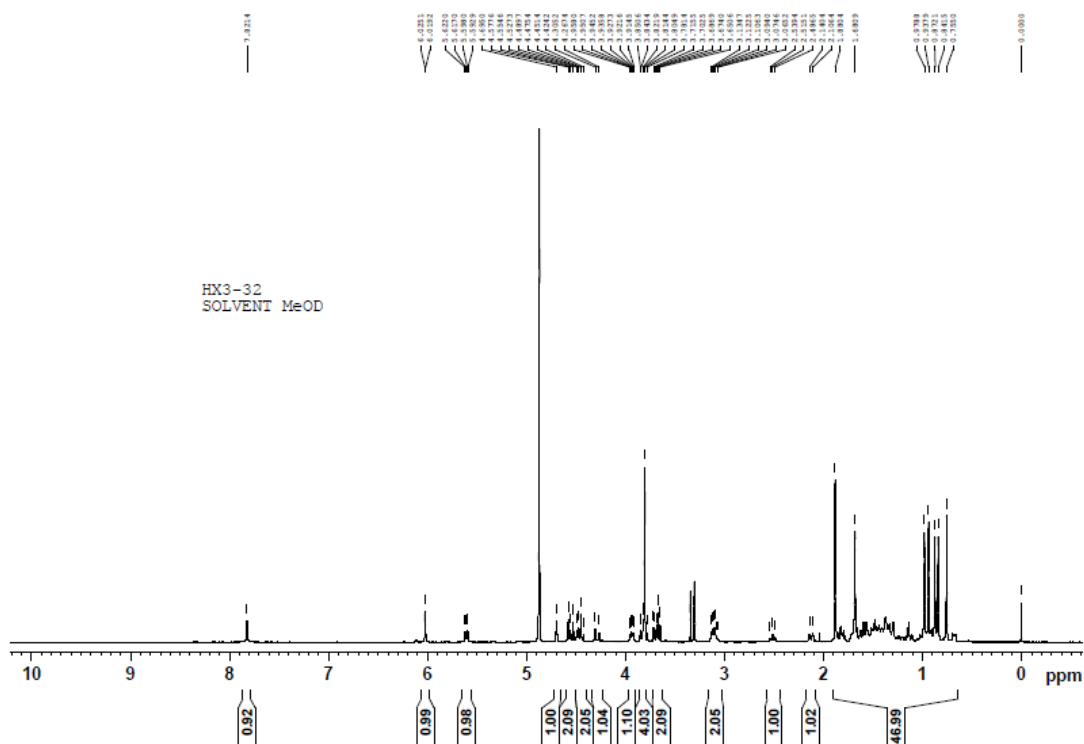



**Figure 27.**  $^{13}\text{C}$  NMR (100 MHz,  $\text{CD}_3\text{OD}$ ) spectrum of compound **9d**

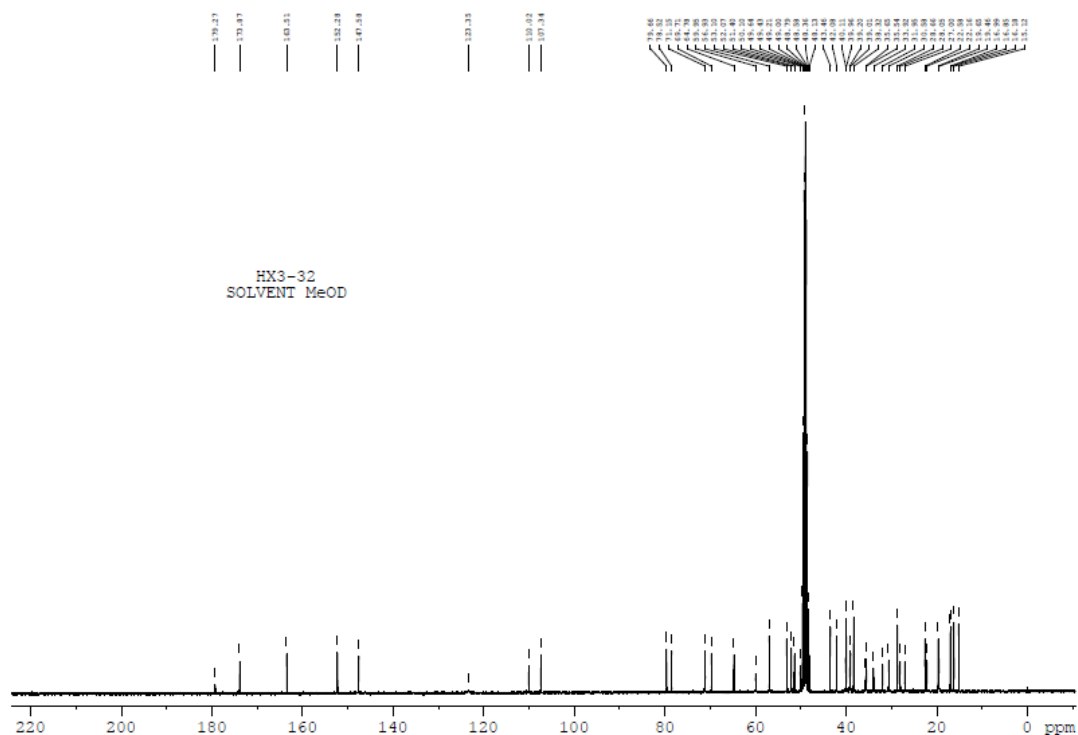

**Figure 28.** HR-ESI-MS spectrum of compound **9d**

HIGH RESOLUTION MASS SPECTROMETRY REPORT

| Sample No. | Formula (M)                                                   | Ion Formula                                                   | Measured m/z | Calc m/z | Diff (ppm) |
|------------|---------------------------------------------------------------|---------------------------------------------------------------|--------------|----------|------------|
| HX3-32     | C <sub>45</sub> H <sub>69</sub> N <sub>5</sub> O <sub>9</sub> | C <sub>45</sub> H <sub>70</sub> N <sub>5</sub> O <sub>9</sub> | 824.5173     | 824.5168 | -0.49      |

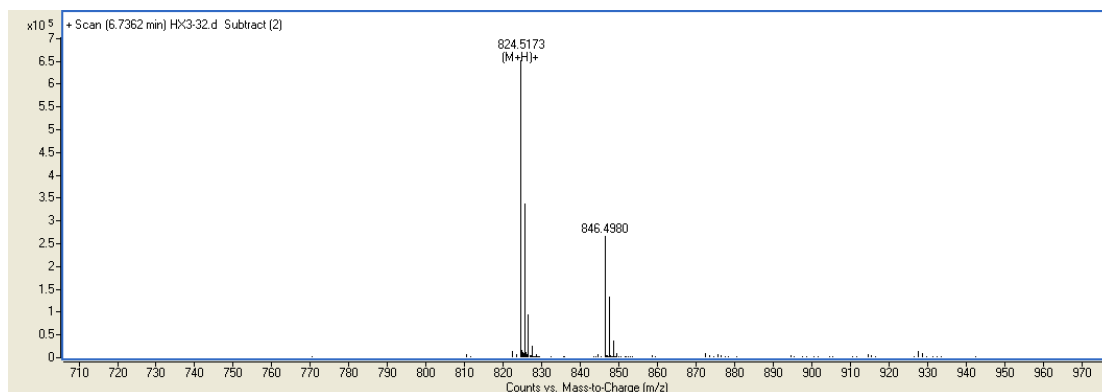

**Figure 29.**  $^1\text{H}$  NMR (400 MHz,  $\text{CD}_3\text{OD}$ ) spectrum of compound **10a**

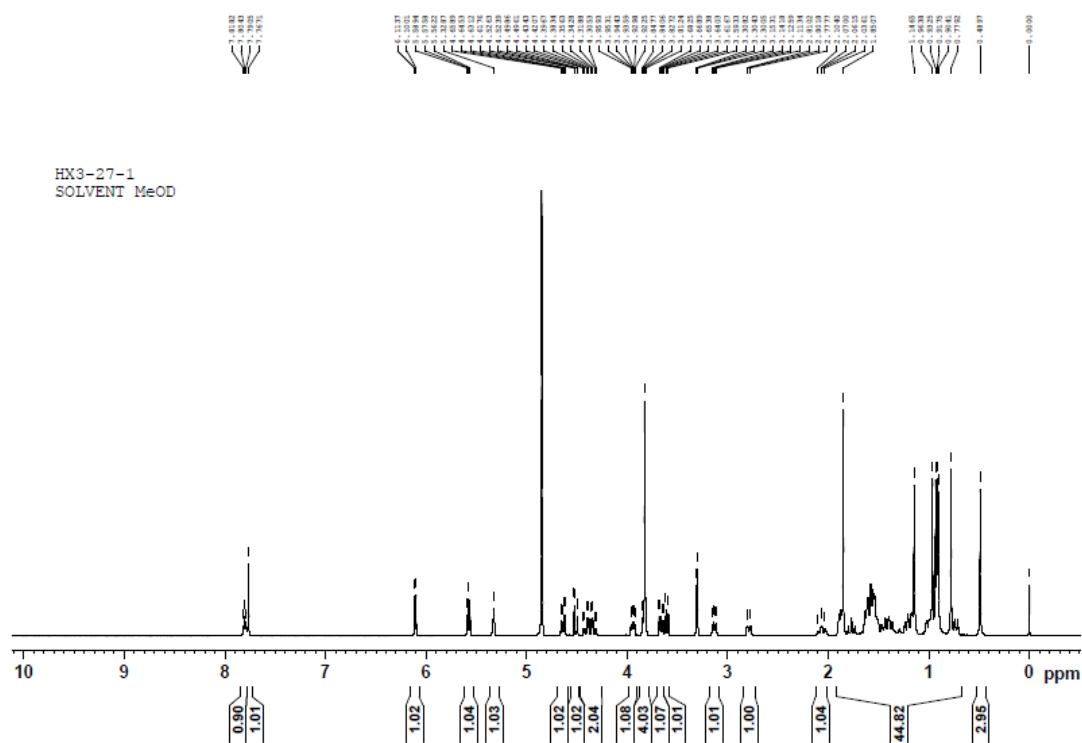

**Figure 30.**  $^{13}\text{C}$  NMR (100 MHz,  $\text{CD}_3\text{OD}$ ) spectrum of compound **10a**

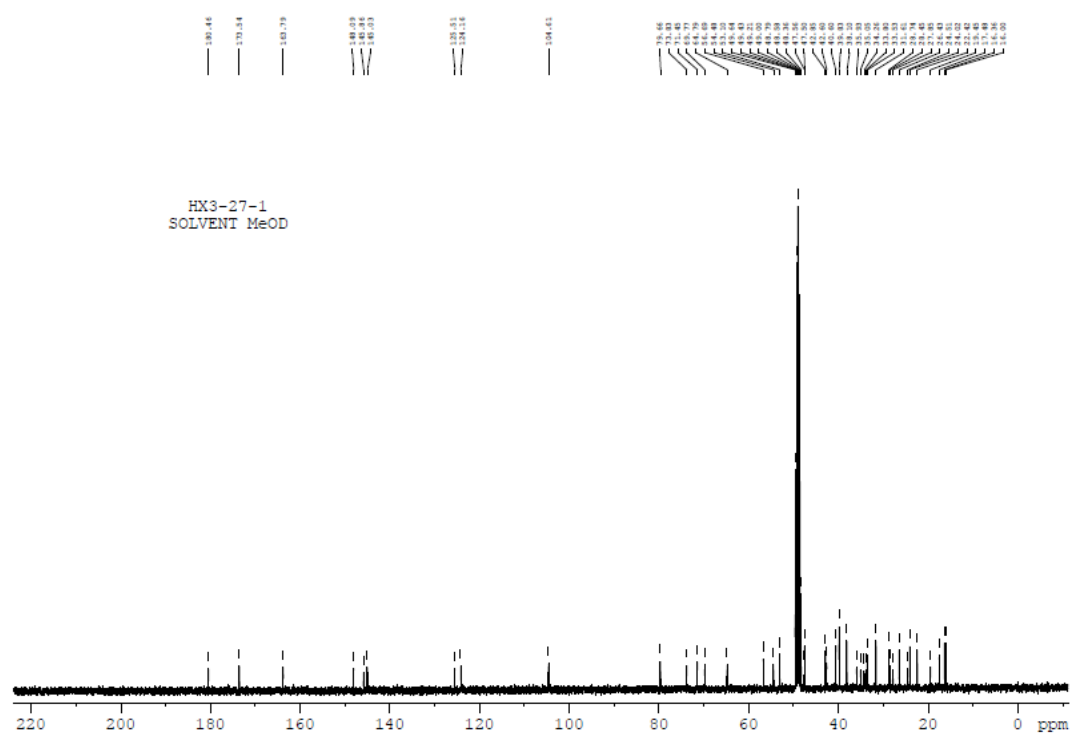

**Figure 31.** HR-ESI-MS spectrum of compound **10a**

HIGH RESOLUTION MASS SPECTROMETRY REPORT

| Sample No. | Formula (M)                                                   | Ion Formula                                                      | Measured m/z | Calc m/z | Diff (ppm) |
|------------|---------------------------------------------------------------|------------------------------------------------------------------|--------------|----------|------------|
| HX3-27-1   | C <sub>45</sub> H <sub>69</sub> N <sub>5</sub> O <sub>9</sub> | C <sub>45</sub> H <sub>69</sub> N <sub>5</sub> Na O <sub>9</sub> | 846.4993     | 846.4987 | -0.7       |

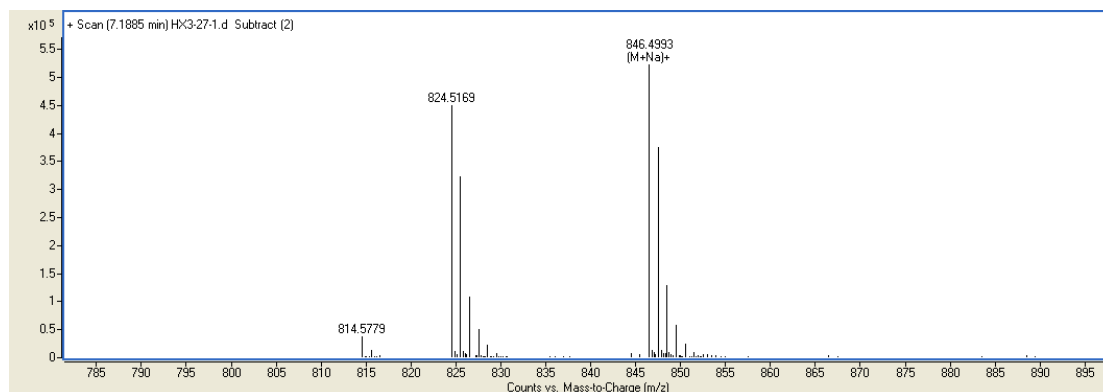

**Figure 32.** <sup>1</sup>H NMR (400 MHz, CD<sub>3</sub>OD) spectrum of compound **10b**

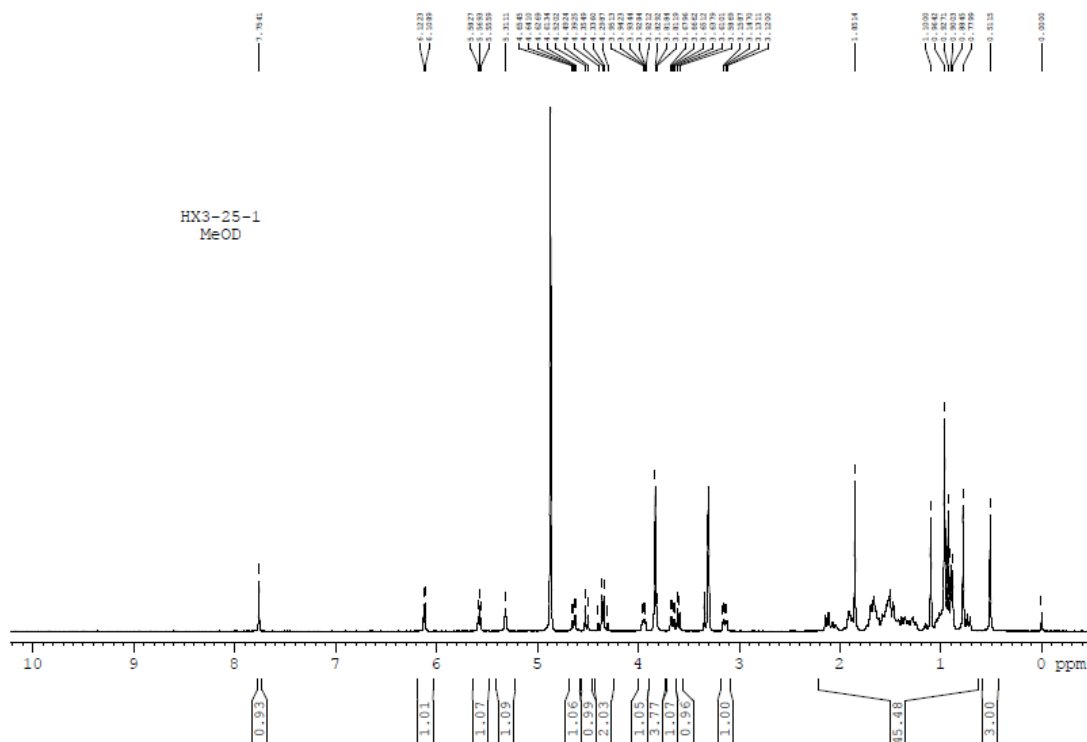

**Figure 33.**  $^{13}\text{C}$  NMR (100 MHz,  $\text{CD}_3\text{OD}$ ) spectrum of compound **10b**

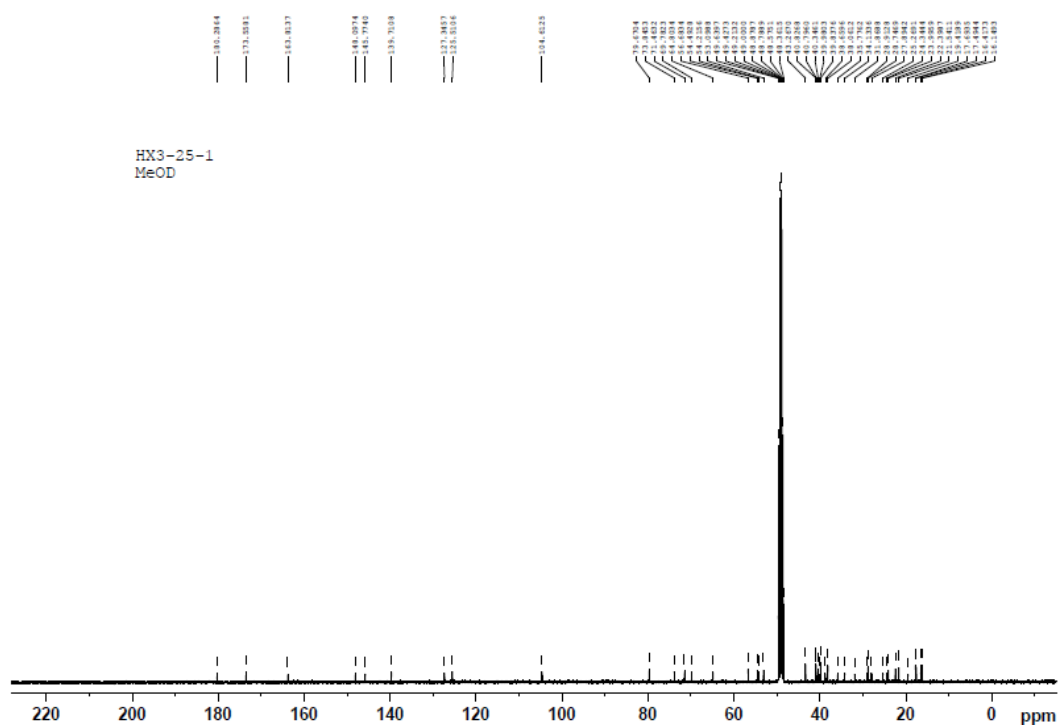

**Figure 34.** HR-ESI-MS spectrum of compound **10b**

#### HIGH RESOLUTION MASS SPECTROMETRY REPORT

| Sample No. | Formula (M)   | Ion Formula      | Measured m/z | Calc m/z | Diff (ppm) |
|------------|---------------|------------------|--------------|----------|------------|
| HX3-25-1   | C45 H69 N5 O9 | C45 H69 N5 Na O9 | 846.4988     | 846.4987 | -0.69      |

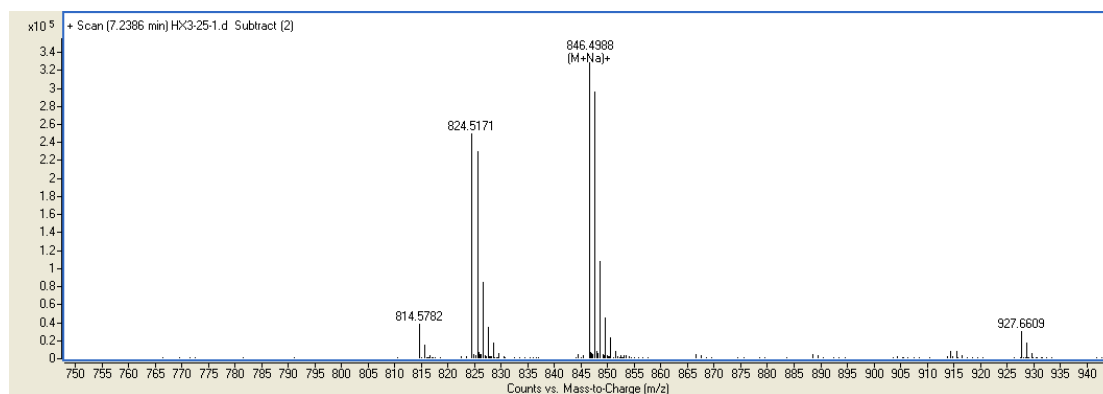

**Figure 35.**  $^1\text{H}$  NMR (400 MHz,  $\text{CD}_3\text{OD}$ ) spectrum of compound **11**

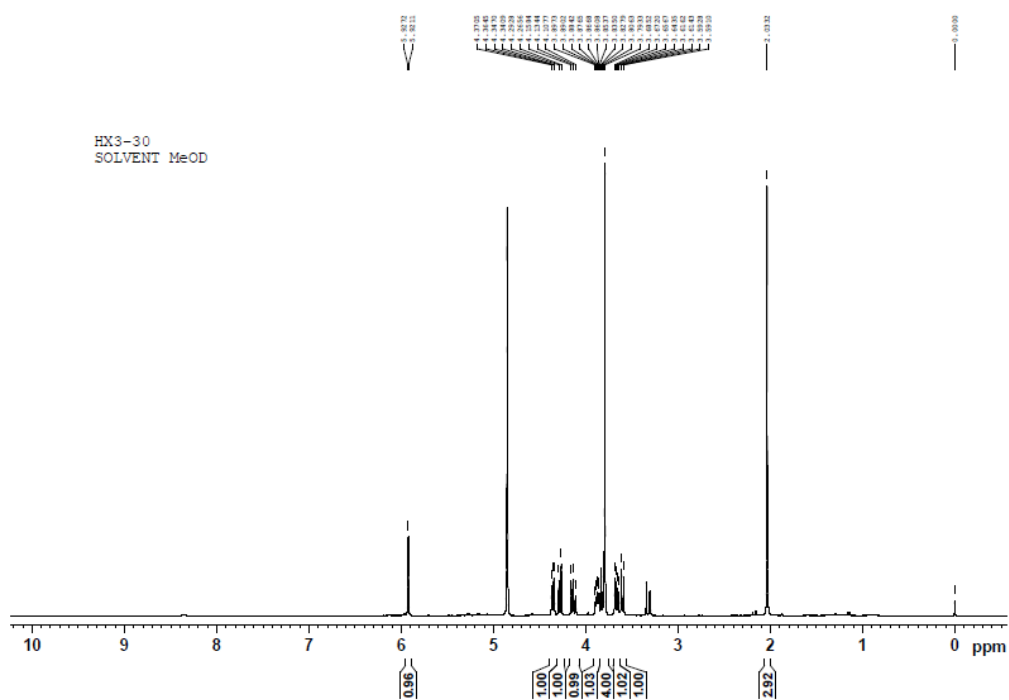

**Figure 36.**  $^{13}\text{C}$  NMR (100 MHz,  $\text{CD}_3\text{OD}$ ) spectrum of compound **11**

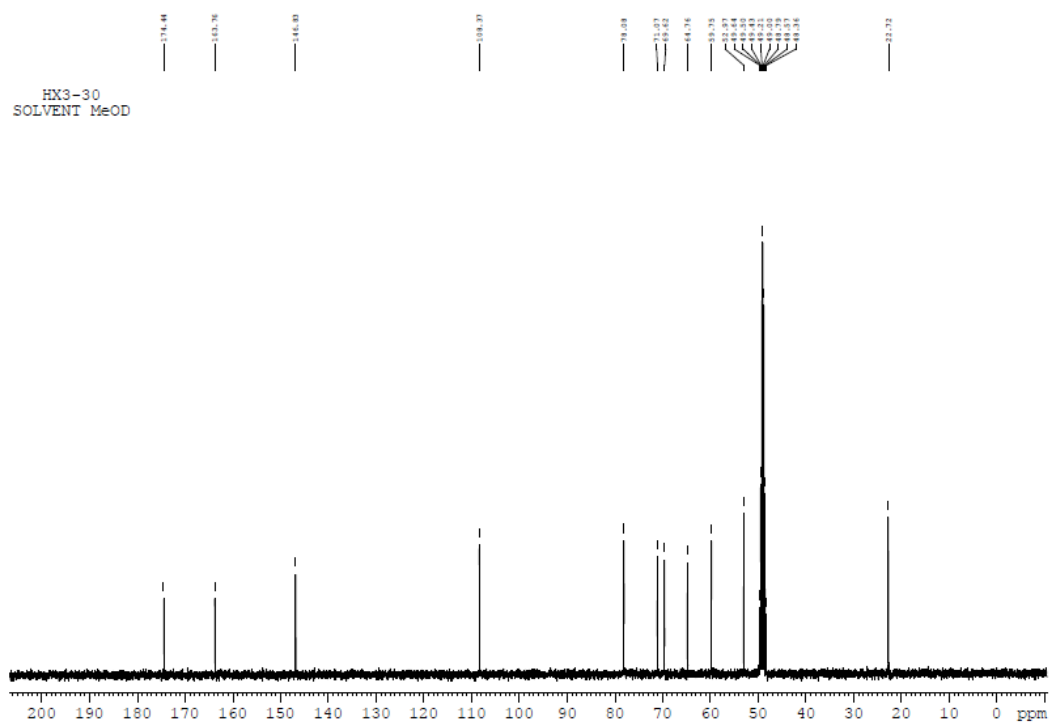

**Figure 37.**  $^1\text{H}$  NMR (400 MHz,  $\text{CDCl}_3$ ) spectrum of compound **15a**

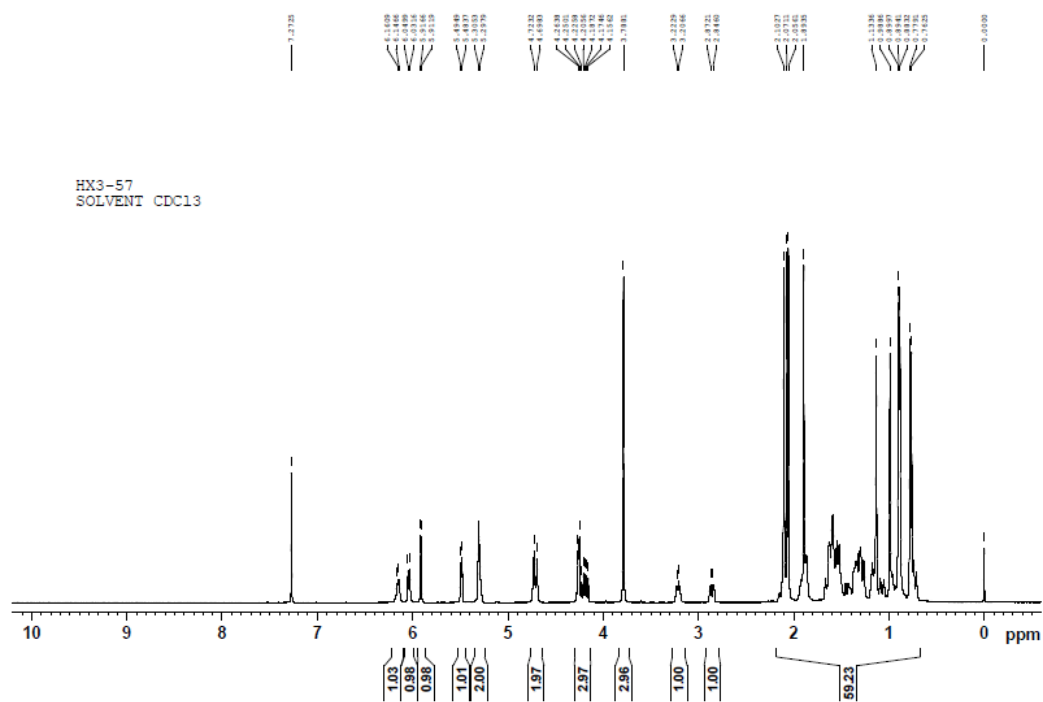

**Figure 38.**  $^{13}\text{C}$  NMR (100 MHz,  $\text{CDCl}_3$ ) spectrum of compound **15a**

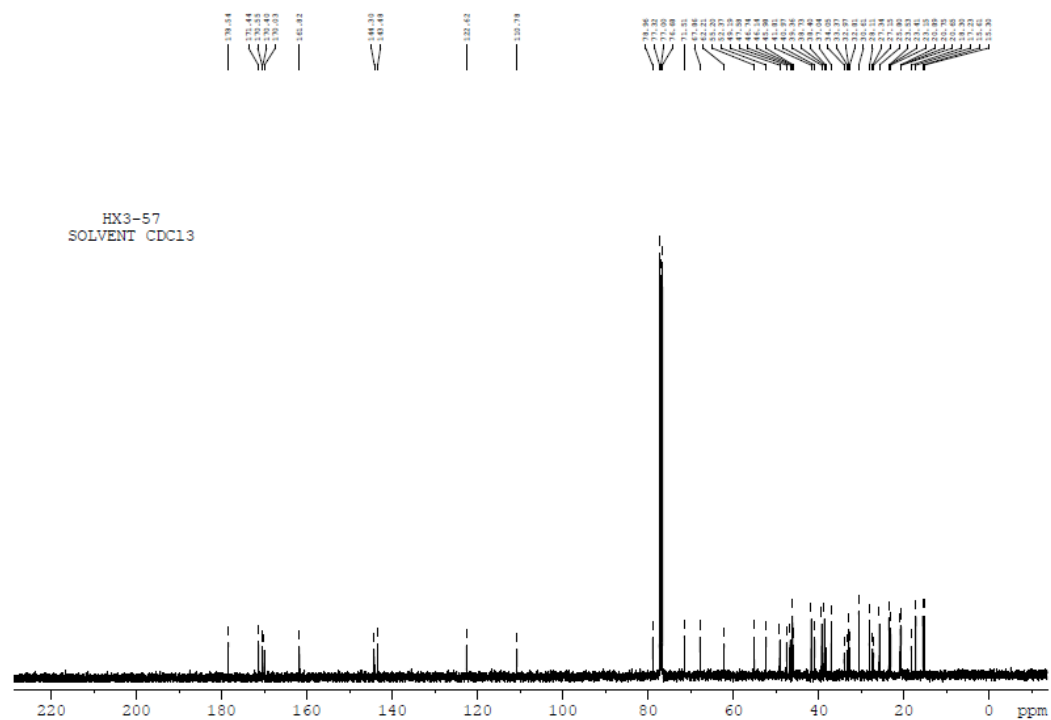

**Figure 39.** HR-ESI-MS spectrum of compound **15a**

HIGH RESOLUTION MASS SPECTROMETRY REPORT

| Sample No. | Formula (M)    | Ion Formula       | Measured m/z | Calc m/z | Diff (ppm) |
|------------|----------------|-------------------|--------------|----------|------------|
| HX3-57     | C48 H72 N2 O12 | C48 H72 N2 Na O12 | 891.4984     | 891.4977 | -0.66      |

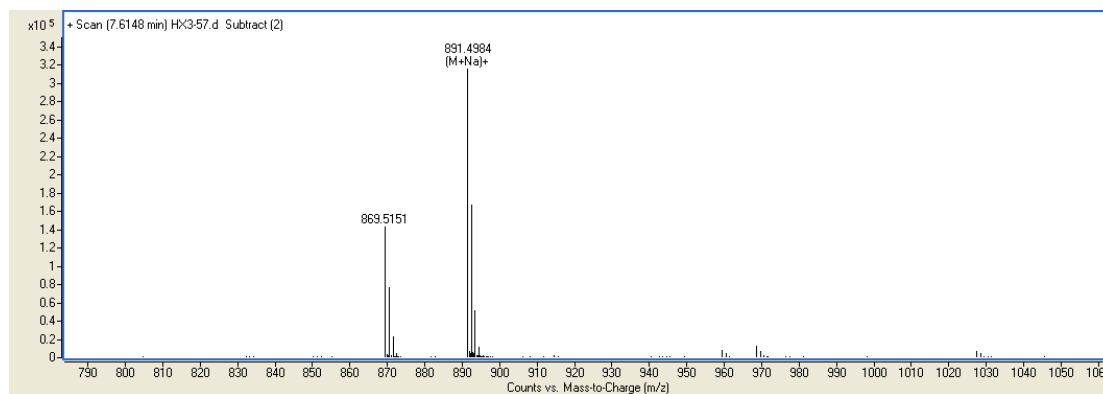

**Figure 40.** <sup>1</sup>H NMR (400 MHz, CDCl<sub>3</sub>) spectrum of compound **15b**

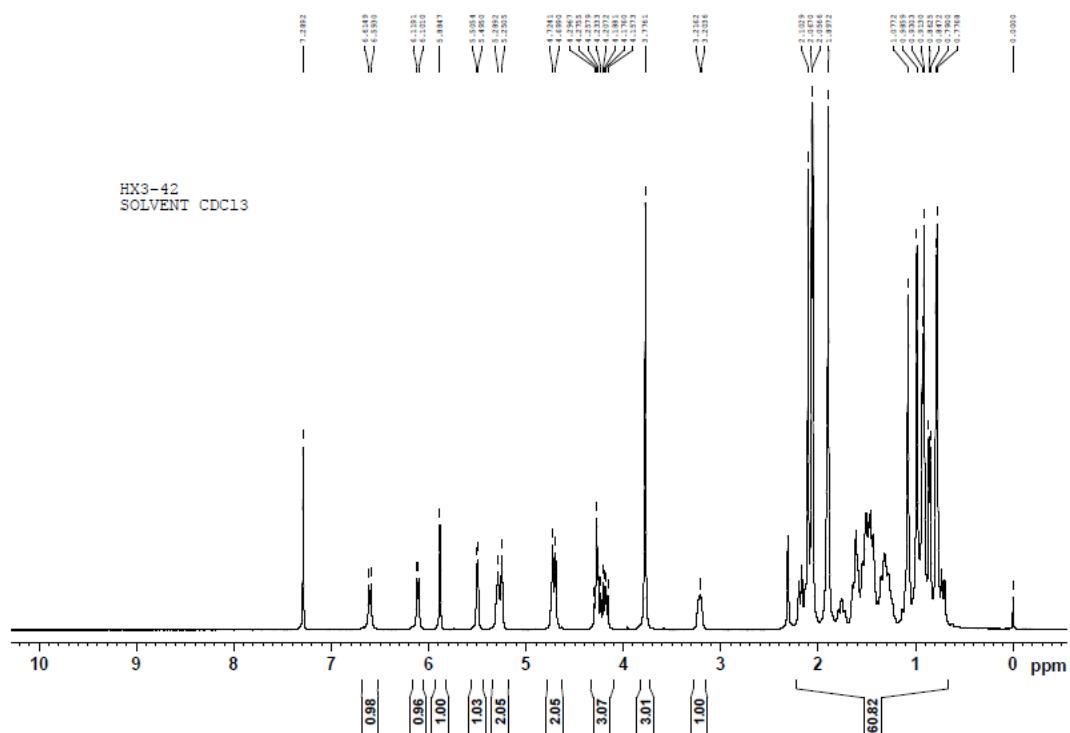

**Figure 41.**  $^{13}\text{C}$  NMR (100 MHz,  $\text{CDCl}_3$ ) spectrum of compound **15b**

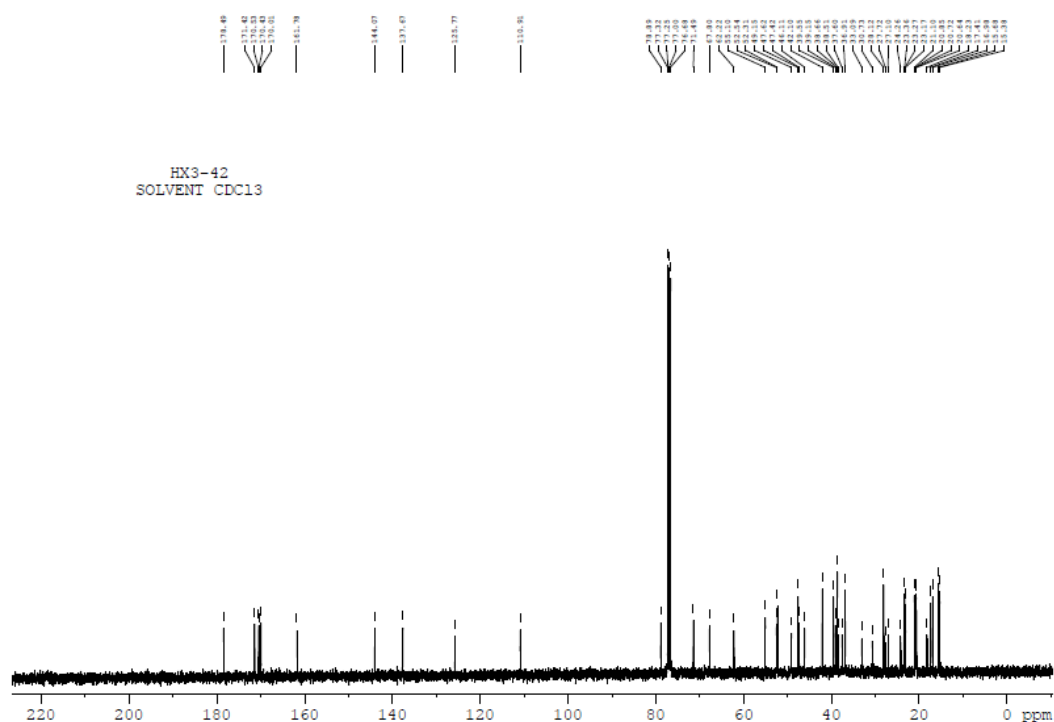

**Figure 42.** HR-ESI-MS spectrum of compound **15b**

#### HIGH RESOLUTION MASS SPECTROMETRY REPORT

| Sample No. | Formula (M)                                         | Ion Formula                                         | Measured m/z | Calc m/z | Diff (ppm) |
|------------|-----------------------------------------------------|-----------------------------------------------------|--------------|----------|------------|
| HX3-42     | $\text{C}_{48}\text{H}_{72}\text{N}_2\text{O}_{12}$ | $\text{C}_{48}\text{H}_{73}\text{N}_2\text{O}_{12}$ | 869.5150     | 869.5158 | 0.86       |

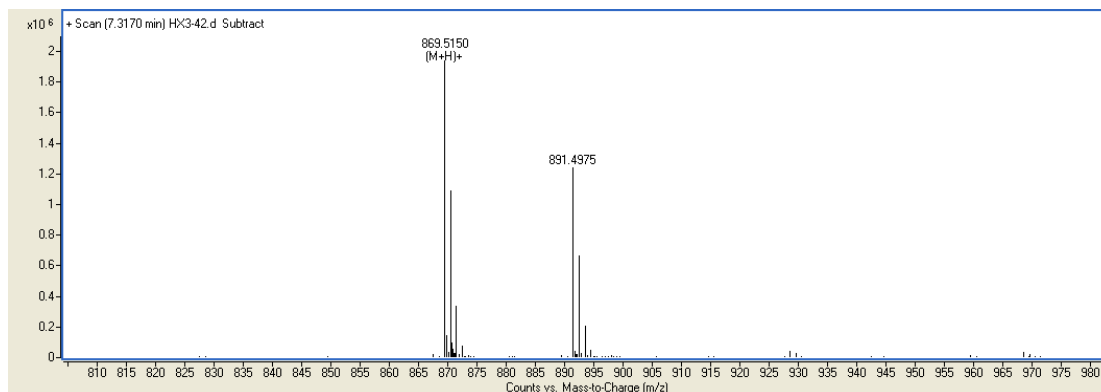



**Figure 43.**  $^1\text{H}$  NMR (400 MHz,  $\text{CDCl}_3$ ) spectrum of compound **15c**

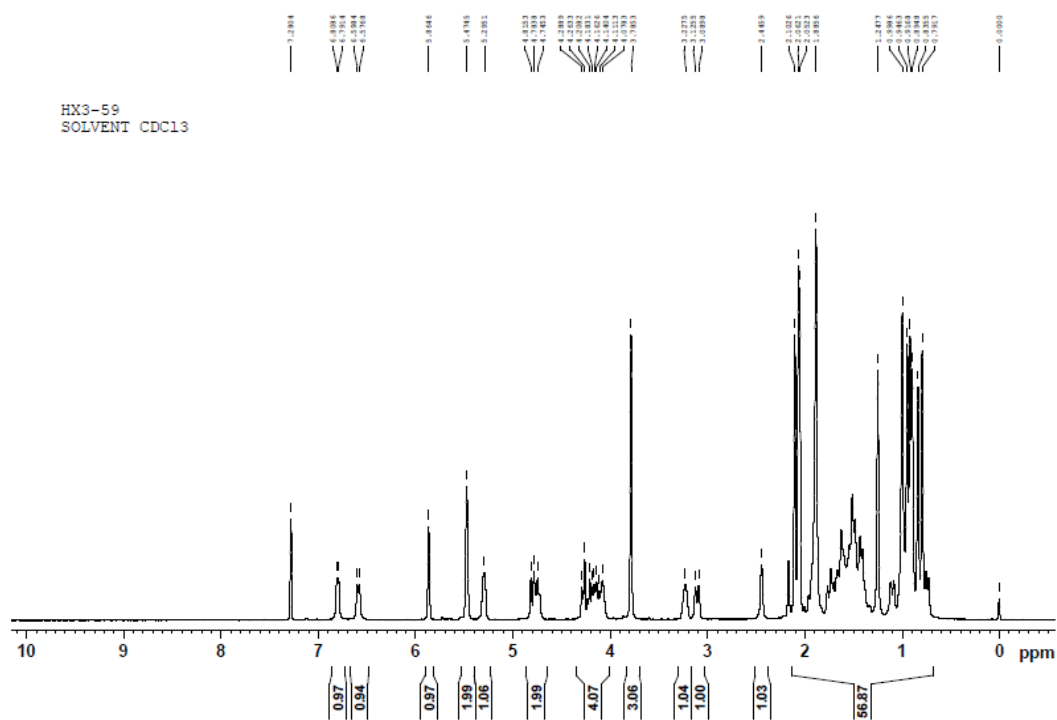

**Figure 44.**  $^{13}\text{C}$  NMR (100 MHz,  $\text{CDCl}_3$ ) spectrum of compound **15c**

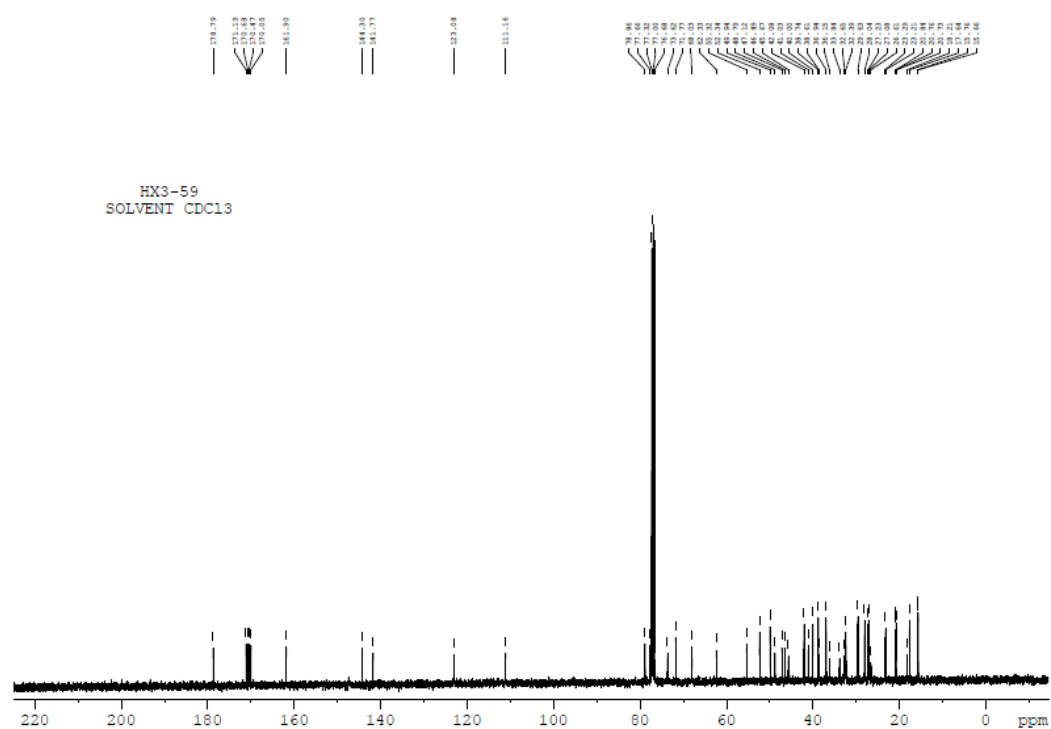

**Figure 45.** HR-ESI-MS spectrum of compound **15c**

HIGH RESOLUTION MASS SPECTROMETRY REPORT

| Sample No. | Formula (M)                                                    | Ion Formula                                                    | Measured m/z | Calc m/z | Diff (ppm) |
|------------|----------------------------------------------------------------|----------------------------------------------------------------|--------------|----------|------------|
| HX3-59     | C <sub>48</sub> H <sub>72</sub> N <sub>2</sub> O <sub>13</sub> | C <sub>48</sub> H <sub>73</sub> N <sub>2</sub> O <sub>13</sub> | 885.5108     | 885.5107 | -0.01      |

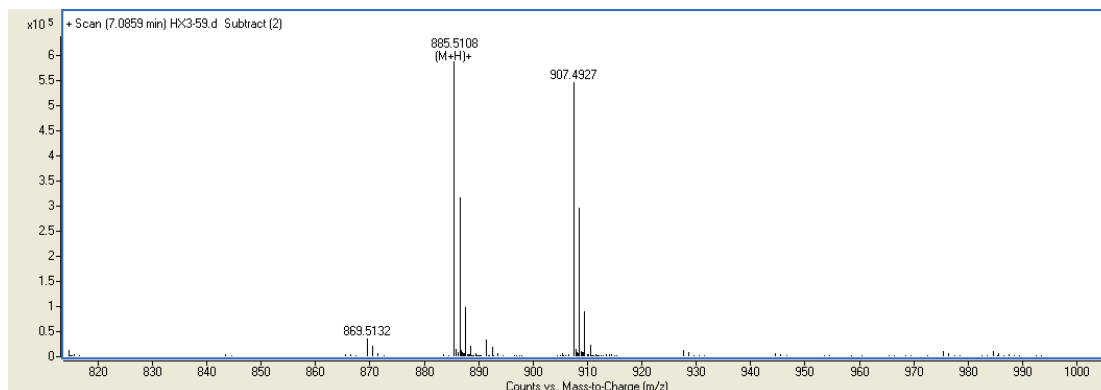

**Figure 46.** <sup>1</sup>H NMR (400 MHz, CDCl<sub>3</sub>) spectrum of compound **15d**

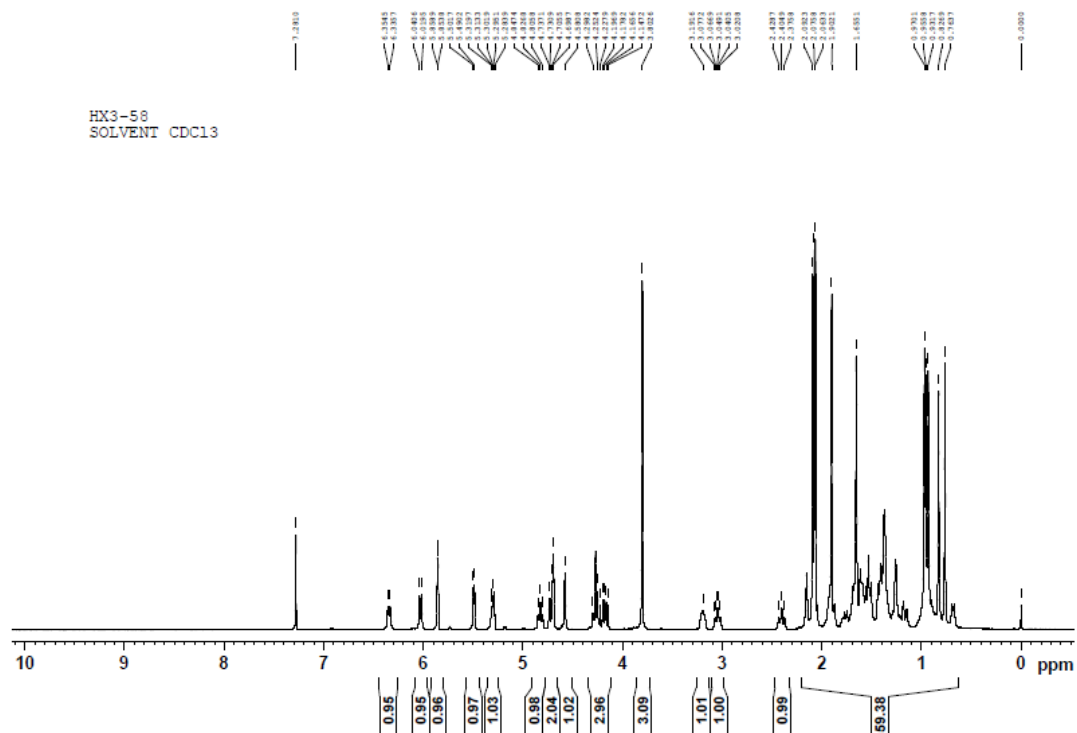

**Figure 47.**  $^{13}\text{C}$  NMR (100 MHz,  $\text{CDCl}_3$ ) spectrum of compound **15d**

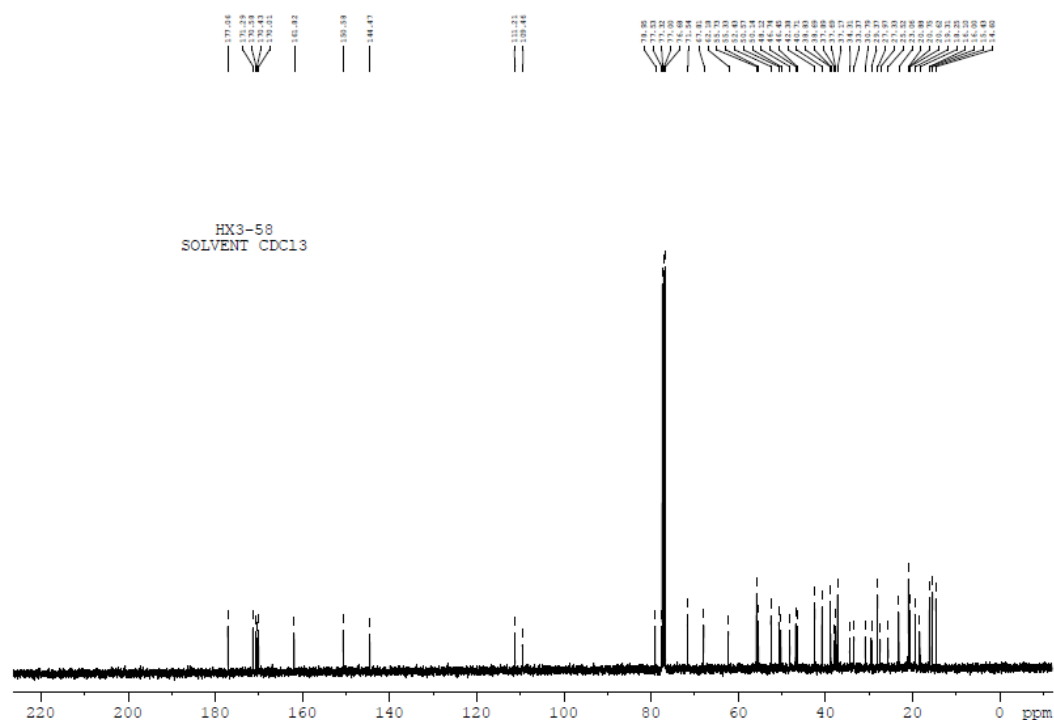

**Figure 48.** HR-ESI-MS spectrum of compound **15d**

HIGH RESOLUTION MASS SPECTROMETRY REPORT

| Sample No. | Formula (M)                                                    | Ion Formula                                                    | Measured m/z | Calc m/z | Diff (ppm) |
|------------|----------------------------------------------------------------|----------------------------------------------------------------|--------------|----------|------------|
| HX3-58     | C <sub>48</sub> H <sub>72</sub> N <sub>2</sub> O <sub>12</sub> | C <sub>48</sub> H <sub>73</sub> N <sub>2</sub> O <sub>12</sub> | 869.5160     | 869.5158 | -0.14      |

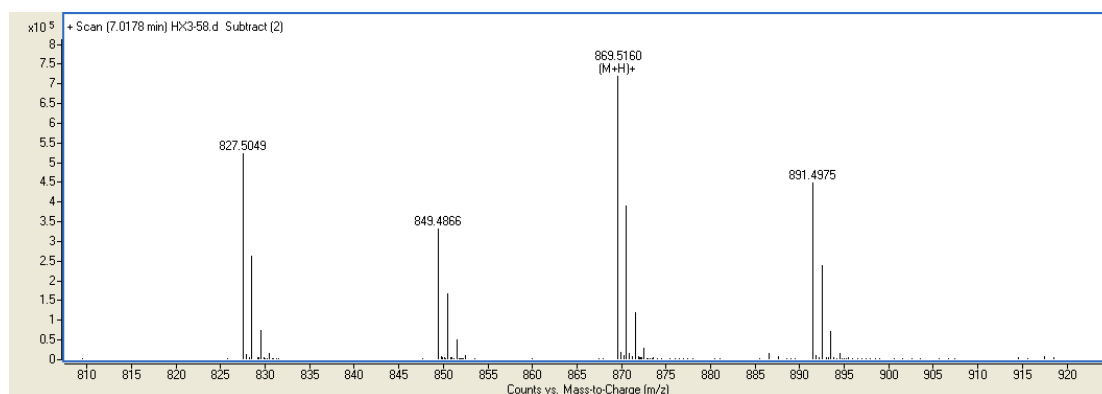

**Figure 49.**  $^1\text{H}$  NMR (400 MHz,  $\text{CD}_3\text{OD}$ ) spectrum of compound **16a**

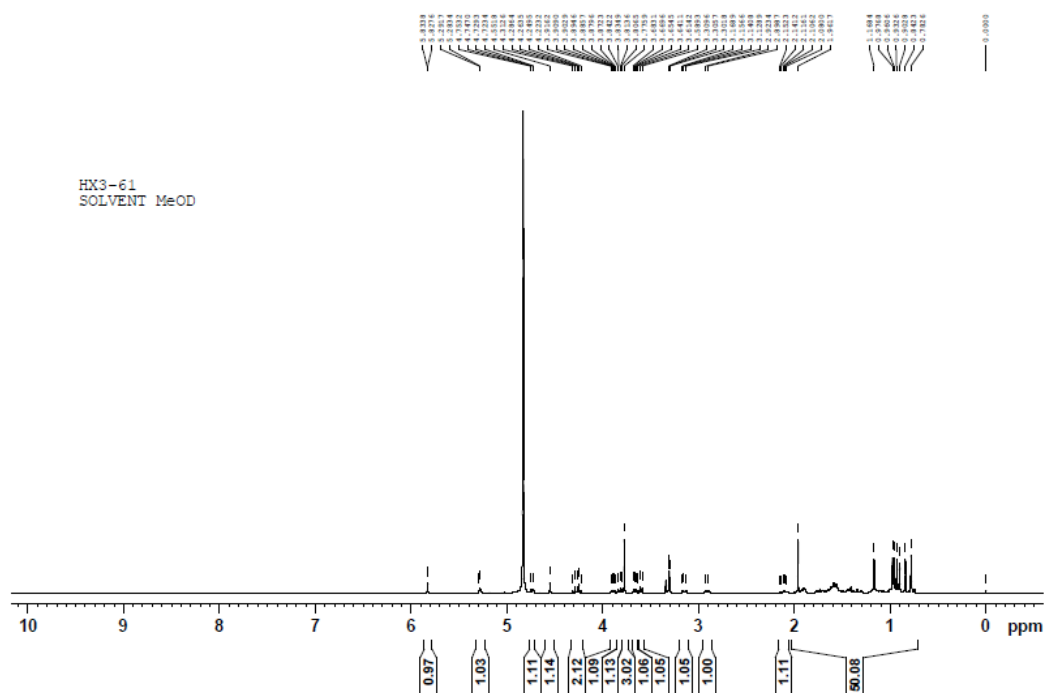

**Figure 50.**  $^{13}\text{C}$  NMR (100 MHz,  $\text{CD}_3\text{OD}$ ) spectrum of compound **16a**

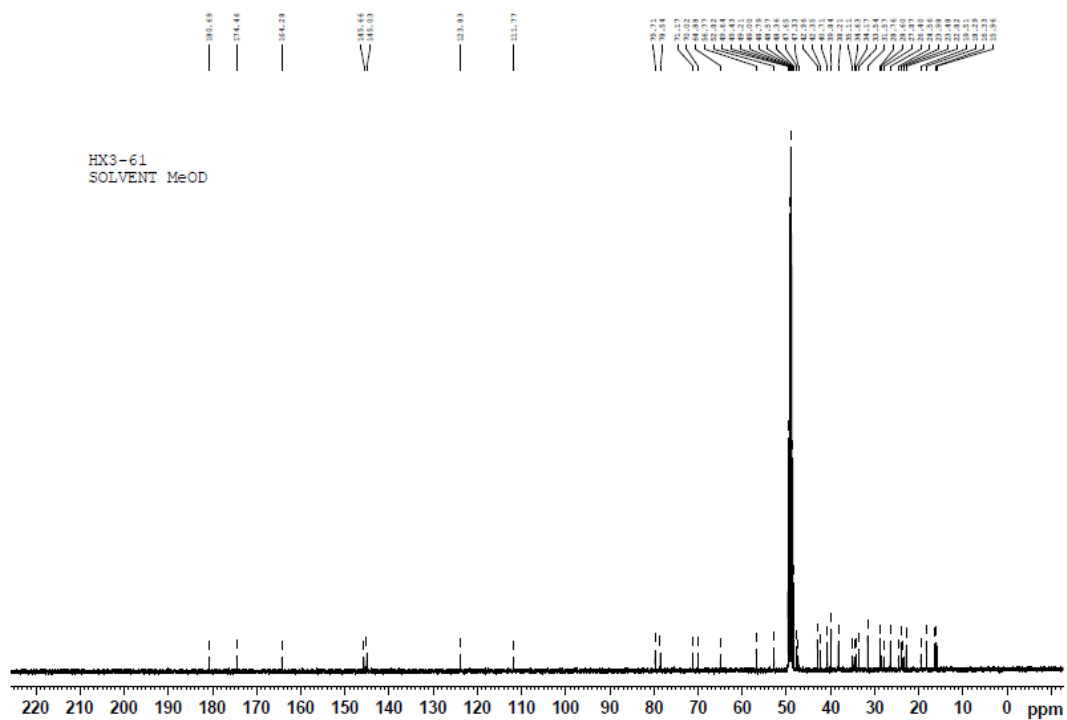

**Figure 51.** HR-ESI-MS spectrum of compound **16a**

HIGH RESOLUTION MASS SPECTROMETRY REPORT

| Sample No. | Formula (M)   | Ion Formula      | Measured m/z | Calc m/z | Diff (ppm) |
|------------|---------------|------------------|--------------|----------|------------|
| HX3-61     | C42 H66 N2 O9 | C42 H66 N2 Na O9 | 765.4669     | 765.4661 | -1.61      |

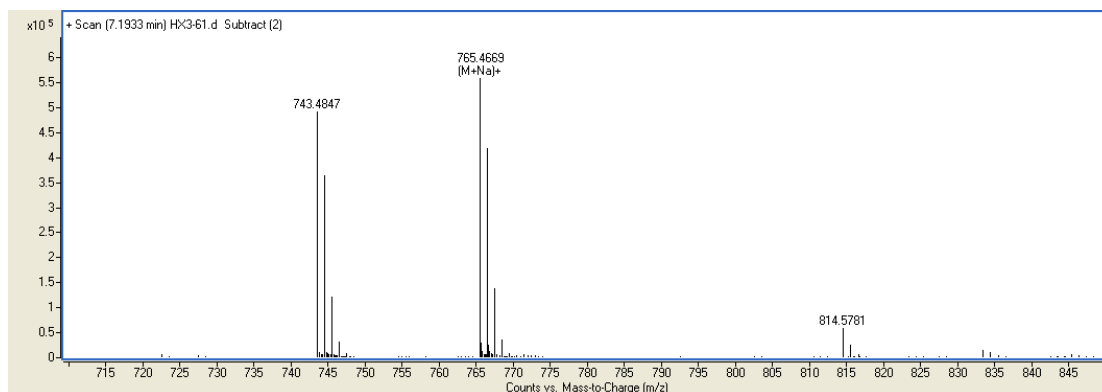

**Figure 52.** <sup>1</sup>H NMR (400 MHz, CD<sub>3</sub>OD) spectrum of compound **16b**

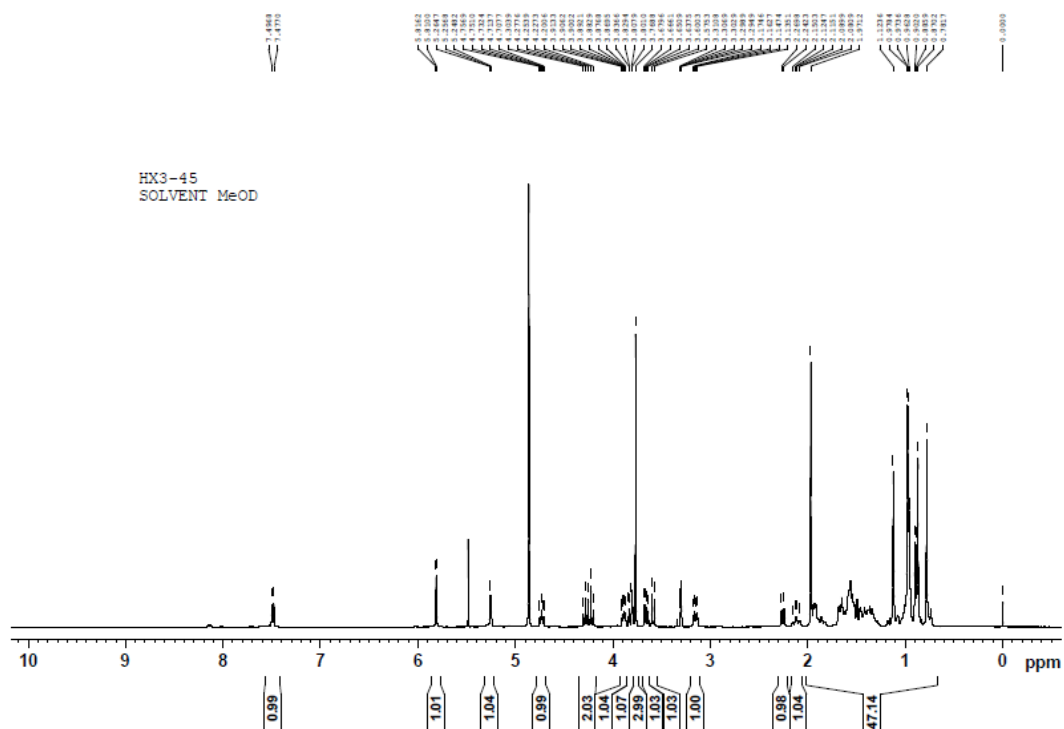

**Figure 53.**  $^{13}\text{C}$  NMR (100 MHz,  $\text{CD}_3\text{OD}$ ) spectrum of compound **16b**

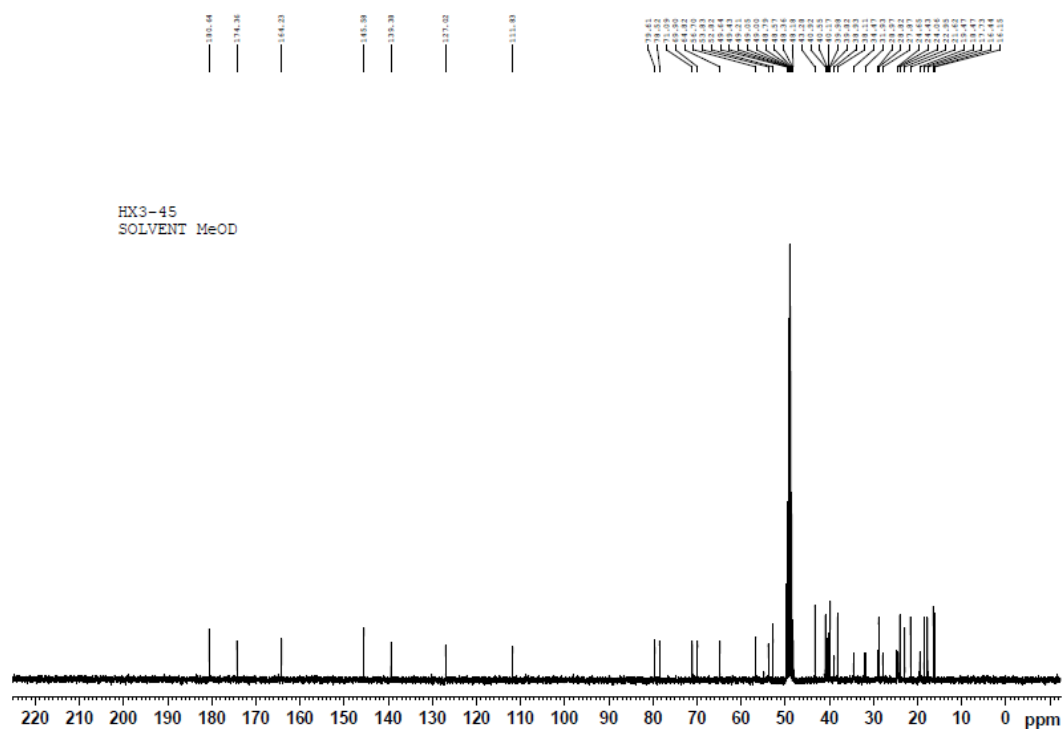

**Figure 54.** HR-ESI-MS spectrum of compound **16b**

#### HIGH RESOLUTION MASS SPECTROMETRY REPORT

| Sample No. | Formula (M)   | Ion Formula   | Measured m/z | Calc m/z | Diff (ppm) |
|------------|---------------|---------------|--------------|----------|------------|
| HX3-45     | C42 H66 N2 O9 | C42 H67 N2 O9 | 743.4846     | 743.4841 | -0.94      |

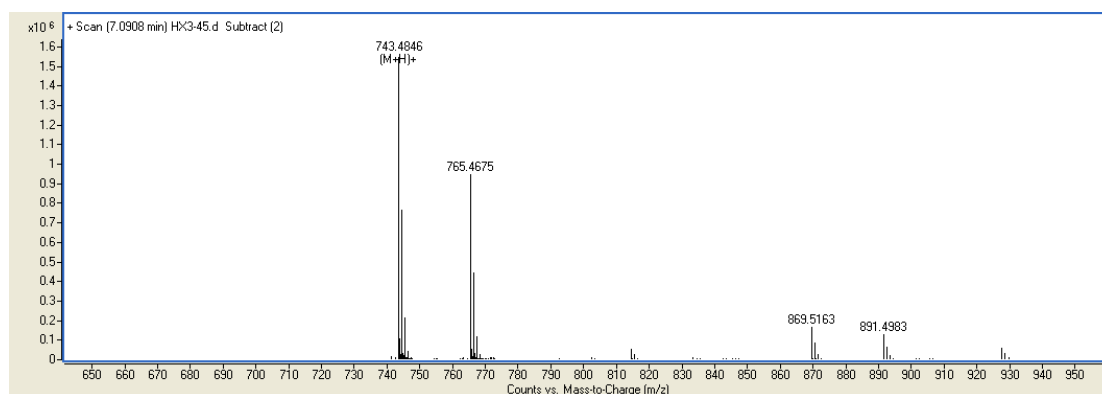

**Figure 55.**  $^1\text{H}$  NMR (400 MHz,  $\text{CD}_3\text{OD}$ ) spectrum of compound **16c**

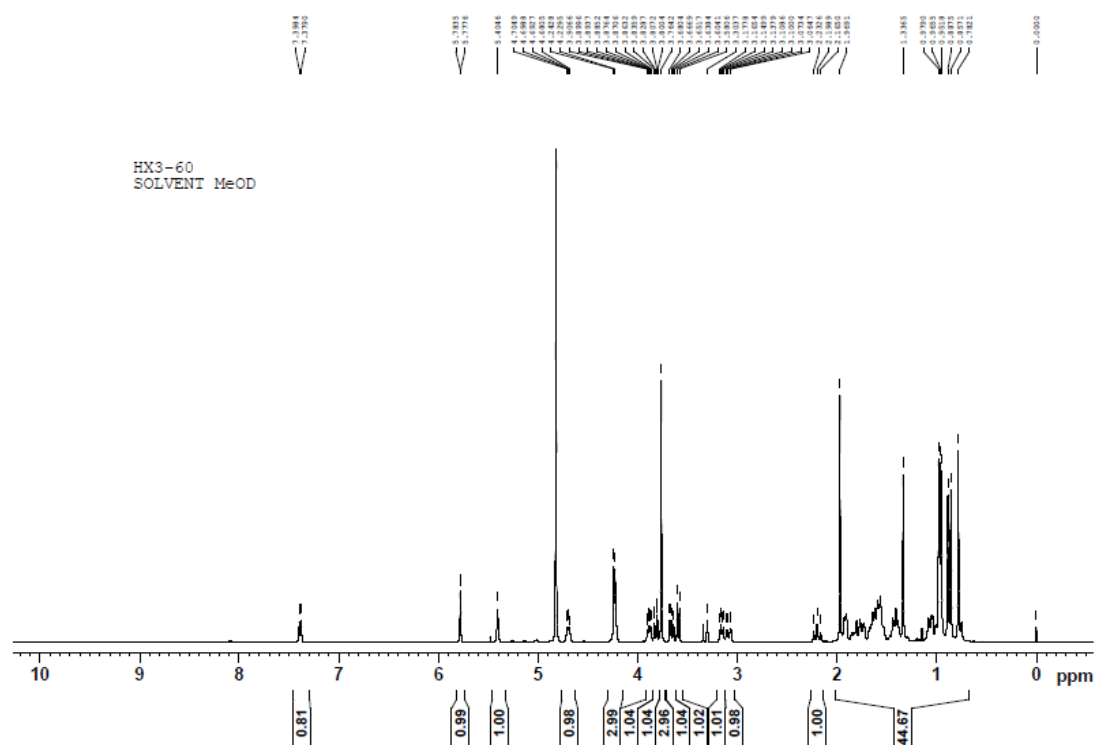

**Figure 57.** HR-ESI-MS spectrum of compound **16c**

HIGH RESOLUTION MASS SPECTROMETRY REPORT

| Sample No. | Formula (M)    | Ion Formula    | Measured m/z | Calc m/z | Diff (ppm) |
|------------|----------------|----------------|--------------|----------|------------|
| HX3-60     | C42 H66 N2 O10 | C42 H67 N2 O10 | 759.4787     | 759.4790 | 0.1        |

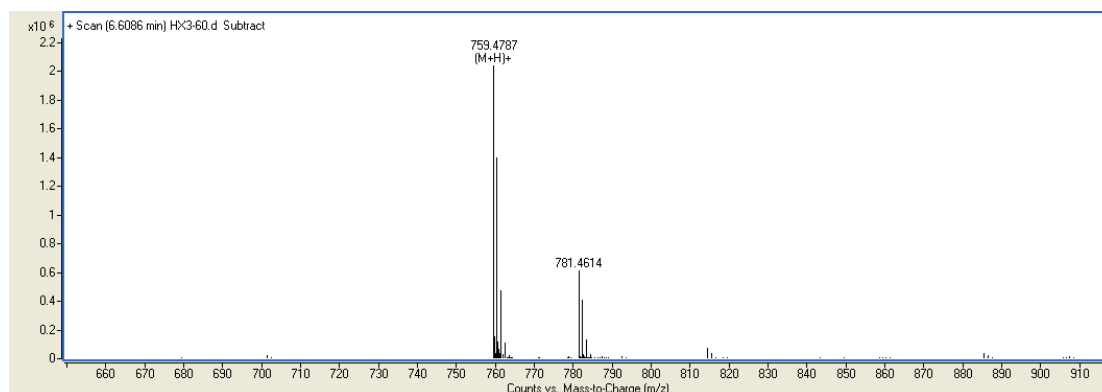

**Figure 58.** <sup>1</sup>H NMR (400 MHz, CD<sub>3</sub>OD) spectrum of compound **16d**

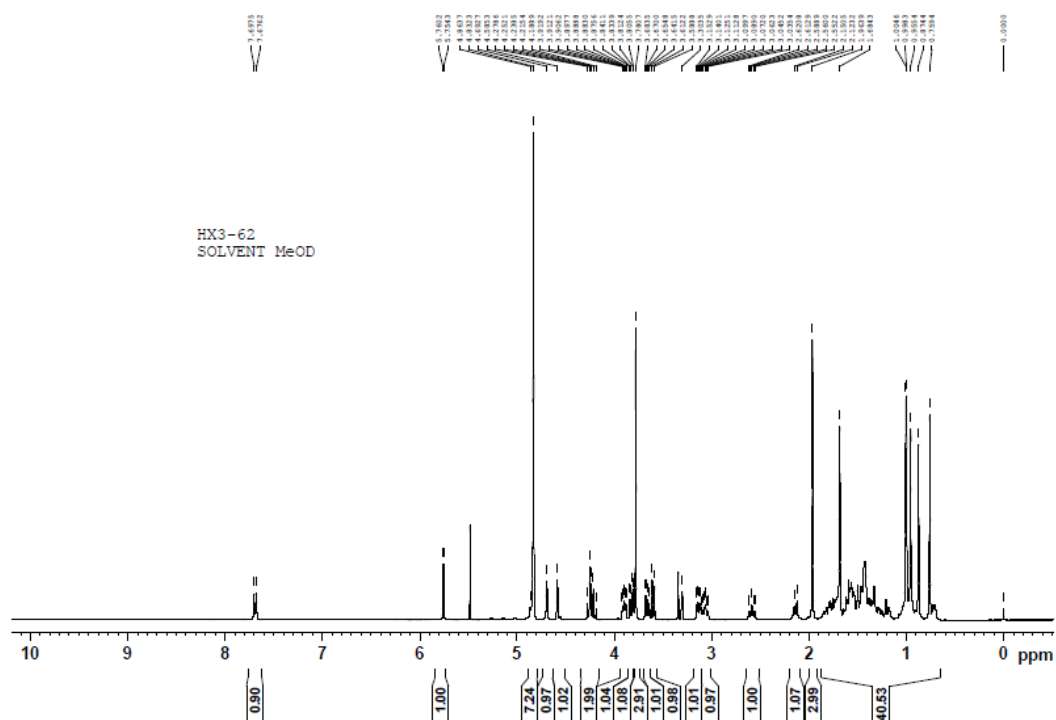



**Figure 59.**  $^{13}\text{C}$  NMR (100 MHz,  $\text{CD}_3\text{OD}$ ) spectrum of compound **16d**

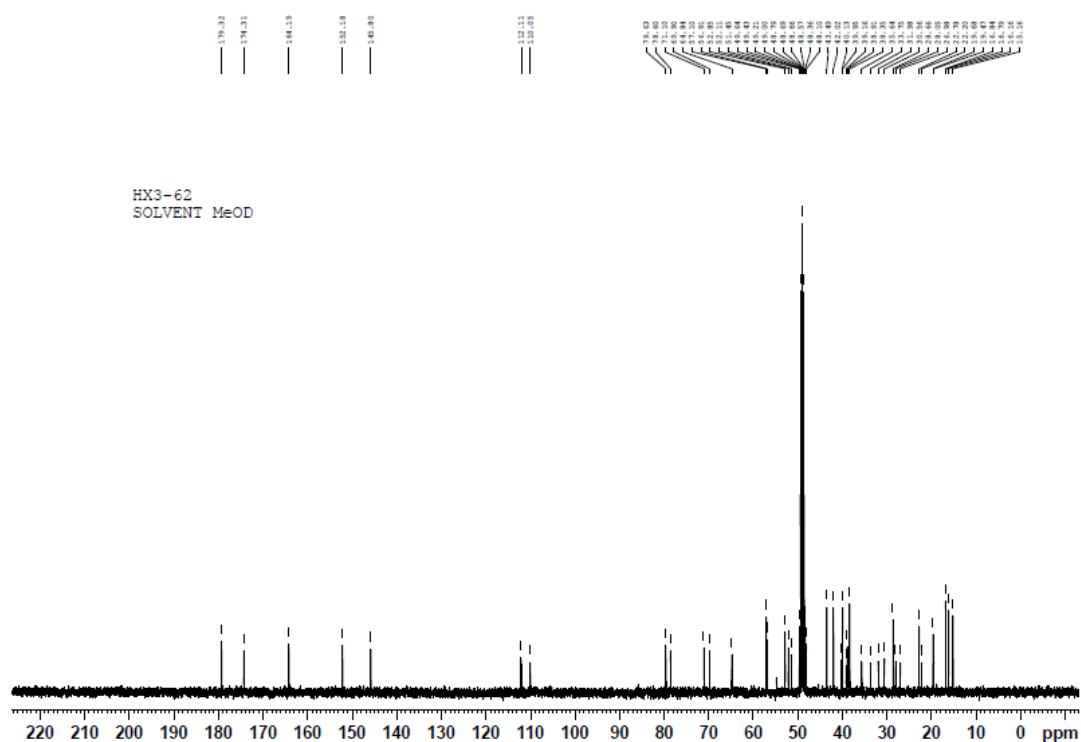

**Figure 60.** HR-ESI-MS spectrum of compound **16d**

HIGH RESOLUTION MASS SPECTROMETRY REPORT

| Sample No. | Formula (M)   | Ion Formula      | Measured m/z | Calc m/z | Diff (ppm) |
|------------|---------------|------------------|--------------|----------|------------|
| HX3-62     | C42 H66 N2 O9 | C42 H66 N2 Na O9 | 765.4667     | 765.4661 | -0.82      |

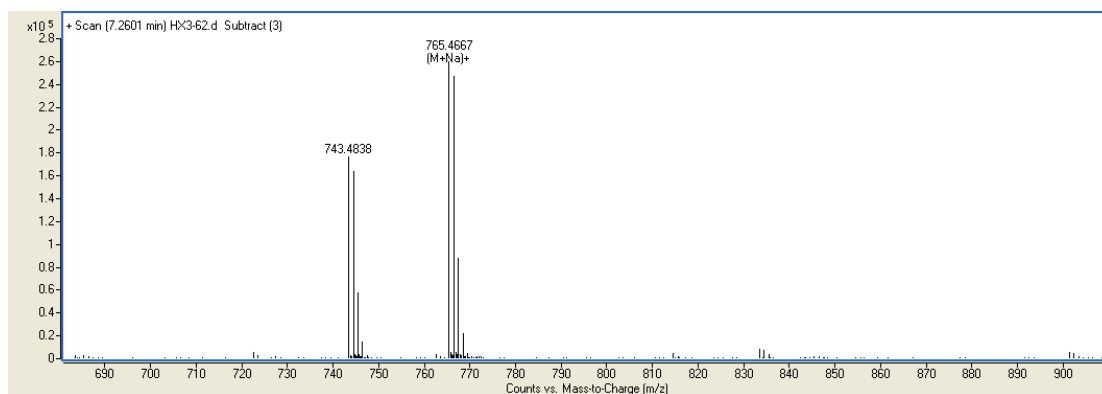

Supplement: MD-008-C7MD00245A-s001.pdf [file MD-008-C7MD00245A-s001.pdf]
